# Supplementary material for: Hexnuclear, octanuclear, dodecanuclear, and hexadecnuclear polyoxomolybdenum(v)-based porous materials for selective adsorption of gases
Source: Royal Society of Chemistry journal article supplement (doi:10.1039/d3ce00736g), 2023-01-01
Supplement: d3ce00736g1.pdf [file d3ce00736g1.pdf]

## Supporting materials

### Hexnuclear, octanuclear, dodecanuclear, hexadecnuclear polyoxomolybdenum(V)-based porous materials for selective adsorptions of gases

Rong-Yan Lin, Ru-Dan Dai, Xin Dong, Zhao-Hui Zhou\*

*State Key Laboratory of Physical Chemistry of Solid Surfaces and Department of Chemistry, College of Chemistry and Chemical Engineering, Xiamen University, Xiamen, 361005, China, Tel: + 86-592-2184531; Fax: + 86-592-2183047  
zhzhou@xmu.edu.cn*

#### Figure and Table Options

**Fig. S1.** Channels in **1** viewed along (0,1,1) direction with an area of  $6.4 \times 3.0 \text{ \AA}^2$ .

**Fig. S2.** Channels in **2** viewed along *c* axis with an area of  $9.0 \times 4.4 \text{ \AA}^2$ .

**Fig. S3.** Channels in **2** viewed along (1,1,0) direction with an area of  $6.2 \times 4.0 \text{ \AA}^2$ .

**Fig. S4.** Channels in **3** viewed along (1,1,1) direction with an area of  $5.4 \times 3.4 \text{ \AA}^2$ .

**Fig. S5.** Solid EPR spectra of **1 – 4** at 110 K respectively.

**Fig. S6.** CO<sub>2</sub> adsorption isotherms for **1** (a), **2** (b), **3** (c) and **4** (d) at different temperatures (298 and 308 K) under the low pressure respectively.

**Fig. S7.** Isothermic heats of adsorptions (*Q<sub>st</sub>*) plotted against CO<sub>2</sub> uptakes for **1 – 4** respectively.

**Fig. S8.** IAST selectivity of CO<sub>2</sub>/CH<sub>4</sub> mixture with different molar ratios for **1**.

**Fig. S9.** Calculated and simulated PXRD patterns of **1 – 4** respectively.

**Fig. S10.** TG-DTG curves of **1 – 4** respectively.

**Fig. S11.** IR spectra of **1(ad)**, **1 – 4** respectively.

**Fig. S12.** IR spectra of 1*H*-benzotriazole, 1*H*-1,2,4-triazol-3-amine and 1*H*-1,2,4-triazole-3,5-diamine ligands respectively.

**Fig. S13.** Solid-state UV-vis reflective spectra for **1 – 4** respectively.

**Fig. S14.** X-ray photoelectron spectra for **1 – 4** respectively.

**Fig. S15.** X-ray photoelectron spectroscopy for **1** before and after adsorptions respectively.

**Fig. S16.** O<sub>2</sub> adsorption and desorption isotherms for **1** at 298K.

**Table S1.** Comparisons of synthetic pH values for **1 – 4** with the other Mo<sub>12</sub>, Mo<sub>8</sub> and Mo<sub>6</sub> POMs.

**Table S2.** Crystallographic data and structural refinements for complexes [Mo<sub>6</sub>O<sub>6</sub>(μ<sub>2</sub>-O)<sub>9</sub>(Hbtz)<sub>6</sub>]·21H<sub>2</sub>O (**1**), [Mo<sub>8</sub>O<sub>8</sub>(μ<sub>2</sub>-O)<sub>12</sub>(Hdatrz)<sub>8</sub>]·28H<sub>2</sub>O (**2**), Na<sub>4</sub>[Mo<sub>12</sub>O<sub>12</sub>(μ<sub>2</sub>-O)<sub>4</sub>(μ<sub>3</sub>-O)<sub>12</sub>(3-trz)<sub>8</sub>]·14H<sub>2</sub>O (**3**) and Na<sub>8</sub>[Mo<sub>16</sub>O<sub>16</sub>(μ<sub>2</sub>-O)<sub>16</sub>(μ<sub>2</sub>-OH)<sub>16</sub>(3-trz)<sub>8</sub>]·29H<sub>2</sub>O (**4**) respectively.

**Table S3.** Selected bond distances (Å) and angles (°) in [Mo<sub>6</sub>O<sub>6</sub>(μ<sub>2</sub>-O)<sub>9</sub>(Hbtz)<sub>6</sub>]·21H<sub>2</sub>O (**1**).

**Table S4.** Selected hydrogen bond distances (Å) and angles (°) in [Mo<sub>6</sub>O<sub>6</sub>(μ<sub>2</sub>-O)<sub>9</sub>(Hbtz)<sub>6</sub>]·21H<sub>2</sub>O (**1**).

**Table S5.** Selected bond distances (Å) and angles (°) in [Mo<sub>8</sub>O<sub>8</sub>(μ<sub>2</sub>-O)<sub>12</sub>(Hdatrz)<sub>8</sub>]·28H<sub>2</sub>O (**2**).

**Table S6.** Selected hydrogen bond distances (Å) and angles (°) in  $[\text{Mo}_8\text{O}_8(\mu_2\text{-O})_{12}(\text{Hdatrz})_8]\cdot 28\text{H}_2\text{O}$  (**2**).

**Table S7.** Selected bond distances ( Å ) and angles (°) in  $\text{Na}_4[\text{Mo}_{12}\text{O}_{12}(\mu_2\text{-O})_4(\mu_3\text{-O})_{12}(3\text{-trz})_8]\cdot 14\text{H}_2\text{O}$  (**3**).

**Table S8.** Selected hydrogen bond distances (Å) and angles (°) in  $\text{Na}_4[\text{Mo}_{12}\text{O}_{12}(\mu_2\text{-O})_4(\mu_3\text{-O})_{12}(3\text{-trz})_8]\cdot 14\text{H}_2\text{O}$  (**3**).

**Table S9.** Selected bond distances ( Å ) and angles (°) in  $\text{Na}_8[\text{Mo}_{16}\text{O}_{16}(\mu_2\text{-O})_{16}(\mu_2\text{-OH})_{16}(3\text{-trz})_8]\cdot 29\text{H}_2\text{O}$  (**4**).

**Table S10.** Selected hydrogen bond distances (Å) and angles (°) in  $\text{Na}_8[\text{Mo}_{16}\text{O}_{16}(\mu_2\text{-O})_{16}(\mu_2\text{-OH})_{16}(3\text{-trz})_8]\cdot 29\text{H}_2\text{O}$  (**4**).

**Table S11.** Bond valence calculations for POMs **1** – **4** respectively.

**Table S12.** Detail calibrated adsorption data of  $\text{O}_2$ ,  $\text{CH}_4$ ,  $\text{H}_2$ ,  $\text{N}_2$  and  $\text{CO}_2$  for  $[\text{Mo}_6\text{O}_6(\mu_2\text{-O})_9(\text{Hbtz})_6]\cdot 21\text{H}_2\text{O}$  (**1**) at 298 K.

**Table S13.** Detail calibrated adsorption data of  $\text{O}_2$ ,  $\text{CH}_4$ ,  $\text{H}_2$ ,  $\text{N}_2$  and  $\text{CO}_2$  for  $[\text{Mo}_8\text{O}_8(\mu_2\text{-O})_{12}(\text{Hdatrz})_8]\cdot 28\text{H}_2\text{O}$  (**2**) at 298 K.

**Table S14.** Detail calibrated adsorption data of  $\text{O}_2$ ,  $\text{CH}_4$ ,  $\text{H}_2$ ,  $\text{N}_2$  and  $\text{CO}_2$  for  $\text{Na}_4[\text{Mo}_{12}\text{O}_{12}(\mu_2\text{-O})_4(\mu_3\text{-O})_{12}(3\text{-trz})_8]\cdot 14\text{H}_2\text{O}$  (**3**) at 298 K.

**Table S15.** Detail calibrated adsorption data of  $\text{O}_2$ ,  $\text{CH}_4$ ,  $\text{H}_2$ ,  $\text{N}_2$  and  $\text{CO}_2$  for  $\text{Na}_8[\text{Mo}_{16}\text{O}_{16}(\mu_2\text{-O})_{16}(\mu_2\text{-OH})_{16}(3\text{-trz})_8]\cdot 29\text{H}_2\text{O}$  (**4**) at 298 K.

**Table S16.** Solid  $^{13}\text{C}$  NMR spectral data (ppm) of **1** – **4** respectively.

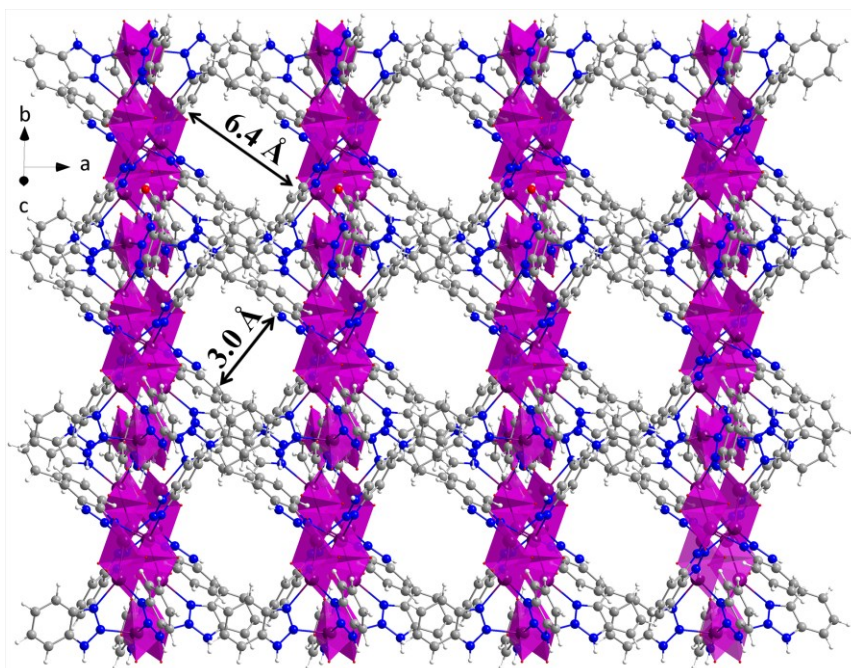

**Fig. S1.** Channels in **1** viewed along (0,1,1) direction with an area of  $6.4 \times 3.0 \text{ \AA}^2$ .

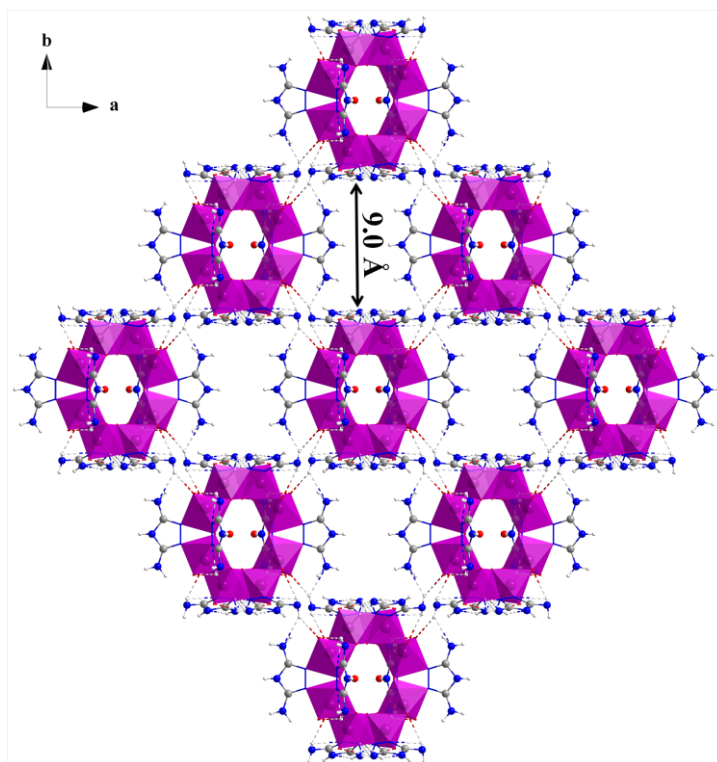

**Fig. S2.** Channels in **2** viewed along *c* axis with an area of  $9.0 \times 4.4 \text{ \AA}^2$ .

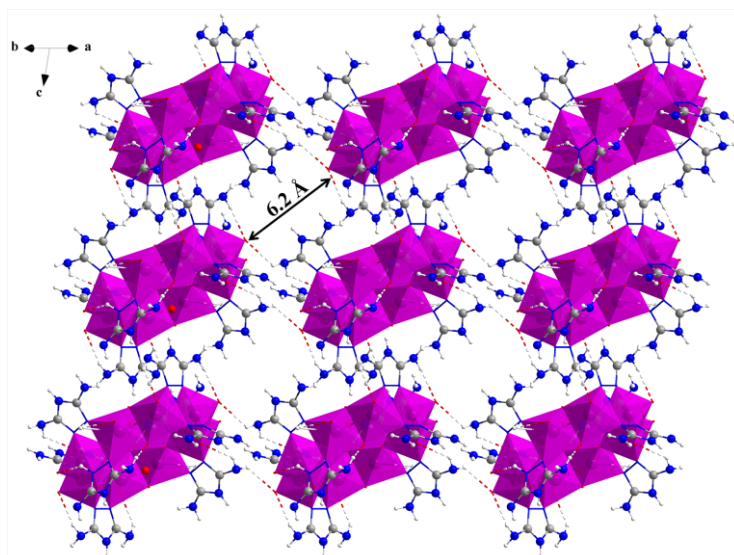

**Fig. S3.** Channels in **2** viewed along (1,1,0) direction with an area of  $6.2 \times 4.0 \text{ \AA}^2$ .

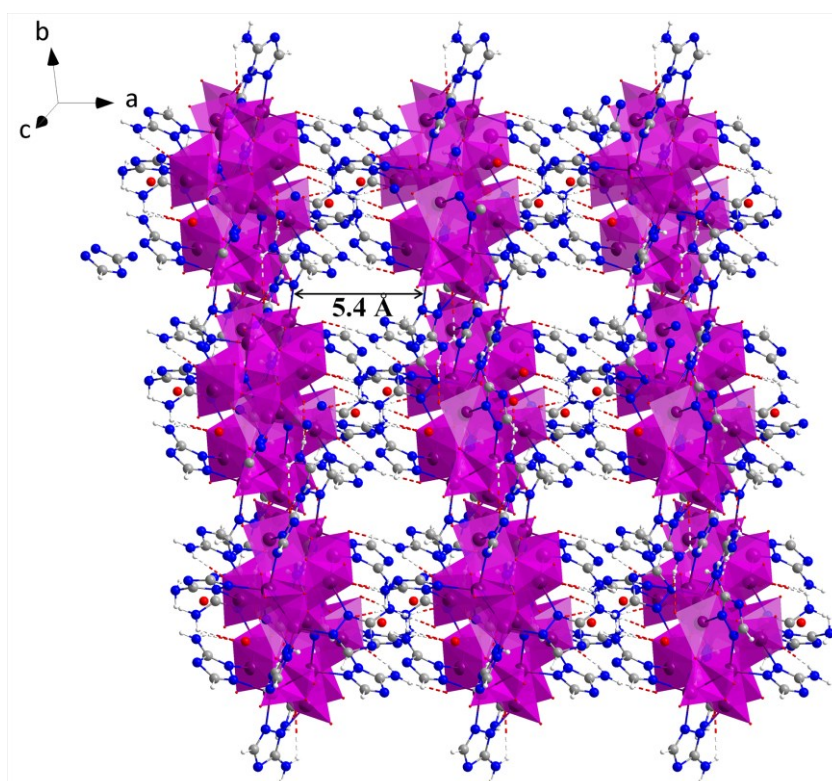

**Fig. S4.** Channels in **3** viewed along (1,1,1) direction with an area of  $5.4 \times 3.4 \text{ \AA}^2$ .

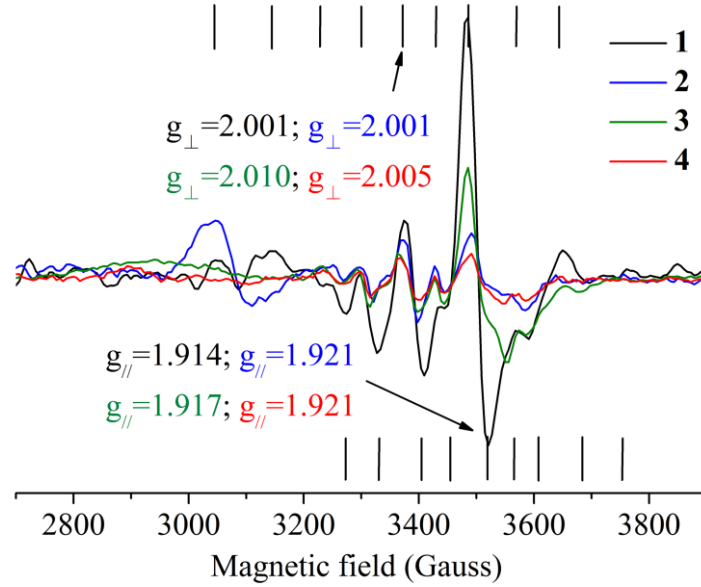

**Fig. S5.** Solid EPR spectra of **1** – **4** at 110 K respectively.

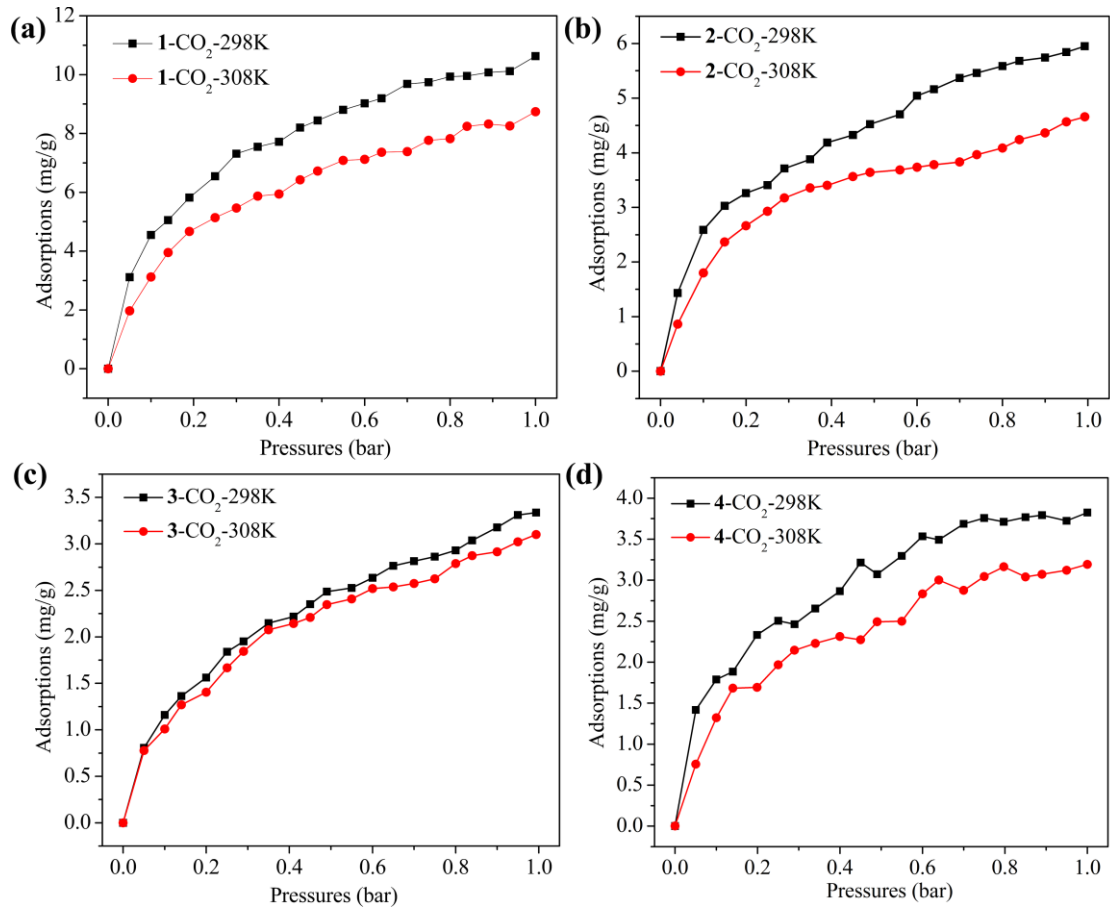

**Fig. S6.** CO<sub>2</sub> adsorption isotherms for **1** (a), **2** (b), **3** (c) and **4** (d) at different temperatures (298 and 308 K) under the low pressure respectively.

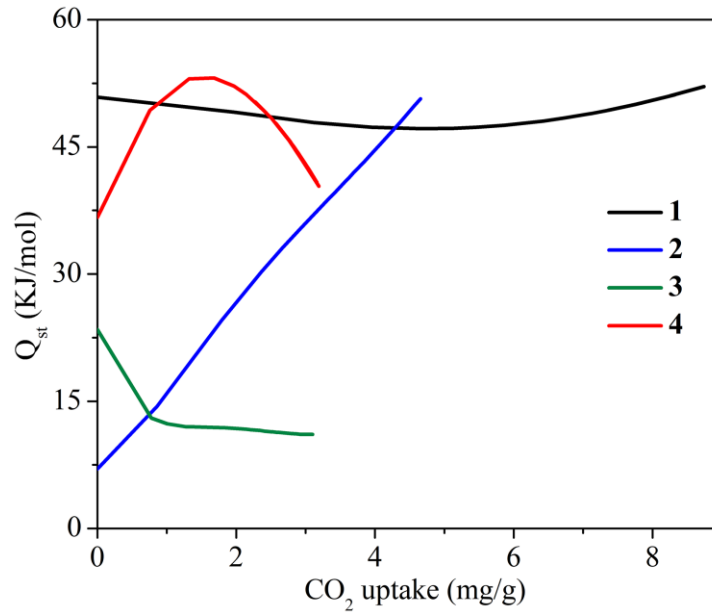

**Fig. S7.** Isosteric heats of adsorptions ( $Q_{st}$ ) plotted against  $CO_2$  uptakes for **1 – 4** respectively.

### $Q_{st}$ Analyses

To extract the coverage-dependent isosteric heat of adsorption, the adsorption data were modeled with a virial-type expression<sup>1</sup> composed of parameters  $a_i$  and  $b_i$ , which are independent from temperature:

$$\ln P = \ln N + \frac{1}{T} \sum_{i=0}^m a_i N^i + \sum_{i=0}^n b_i N^i \quad (1)$$

$$Q_{st} = -R \sum_{i=0}^m a_i N^i \quad (2)$$

Where  $P$  is pressure,  $N$  is the amount adsorbed (or uptake),  $T$  is temperature,  $m$  and  $n$  determine the number of terms that required describing the isotherm adequately, and  $R$  is the universal gas constant. The  $Q_{st}$  was calculated by fitting the adsorption data at different temperatures in the pressure range of 0 ~ 1 bar.

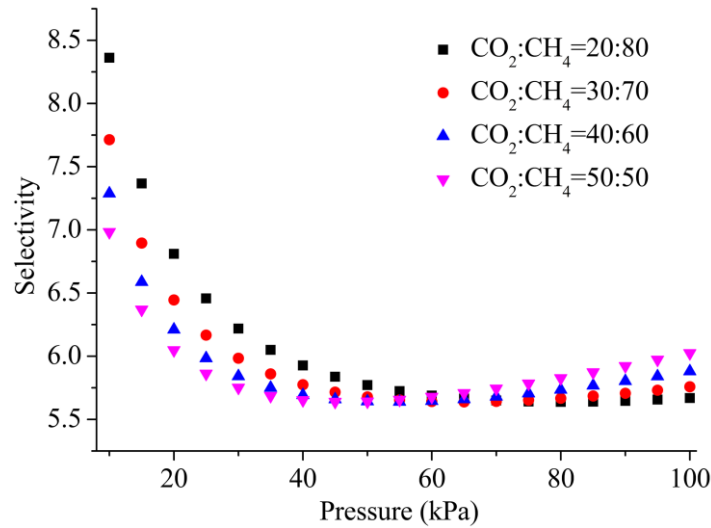

**Fig. S8.** IAST selectivity of CO<sub>2</sub>/CH<sub>4</sub> mixture with different molar ratios for **1**.

### Calculation of CO<sub>2</sub>/CH<sub>4</sub> selectivity

The ideal adsorbed solution theory (IAST) developed by Myers and Praunitz was used to quantify the selectivities to CO<sub>2</sub>/CH<sub>4</sub> gas mixtures with different molar ratios for **1**. Pure component isotherm of CO<sub>2</sub> and CH<sub>4</sub> at 298 K were fitted to the single-site Langmuir-Freundlich (LF) model:

$$N = a \times \frac{bp^c}{1 + bp^c}$$

where  $a$  represents the saturation adsorption capacities;  $b$  is the affinity constants;  $p$  is the pressure of the bulk gas at equilibrium with the adsorbed phase;  $c$  is the deviations from an ideal homogeneous surface.

The adsorption selectivity is defined as

$$S = \frac{x_1/x_2}{y_1/y_2}$$

where  $x$  is the molar fraction in the adsorbed phase and  $y$  is the molar fraction in the gas phase.

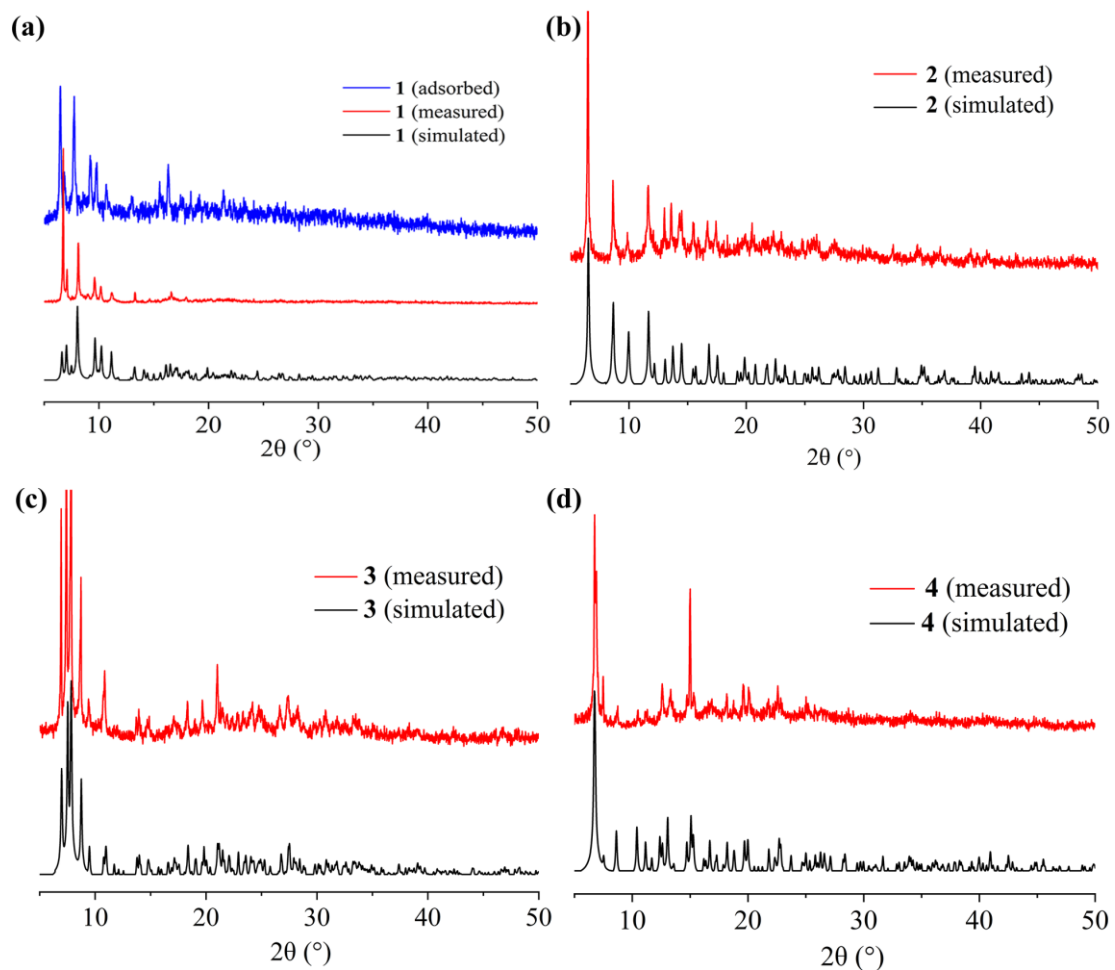

**Fig. S9.** Calculated and simulated PXRD patterns of **1(ad.)**, **1 – 4** respectively.



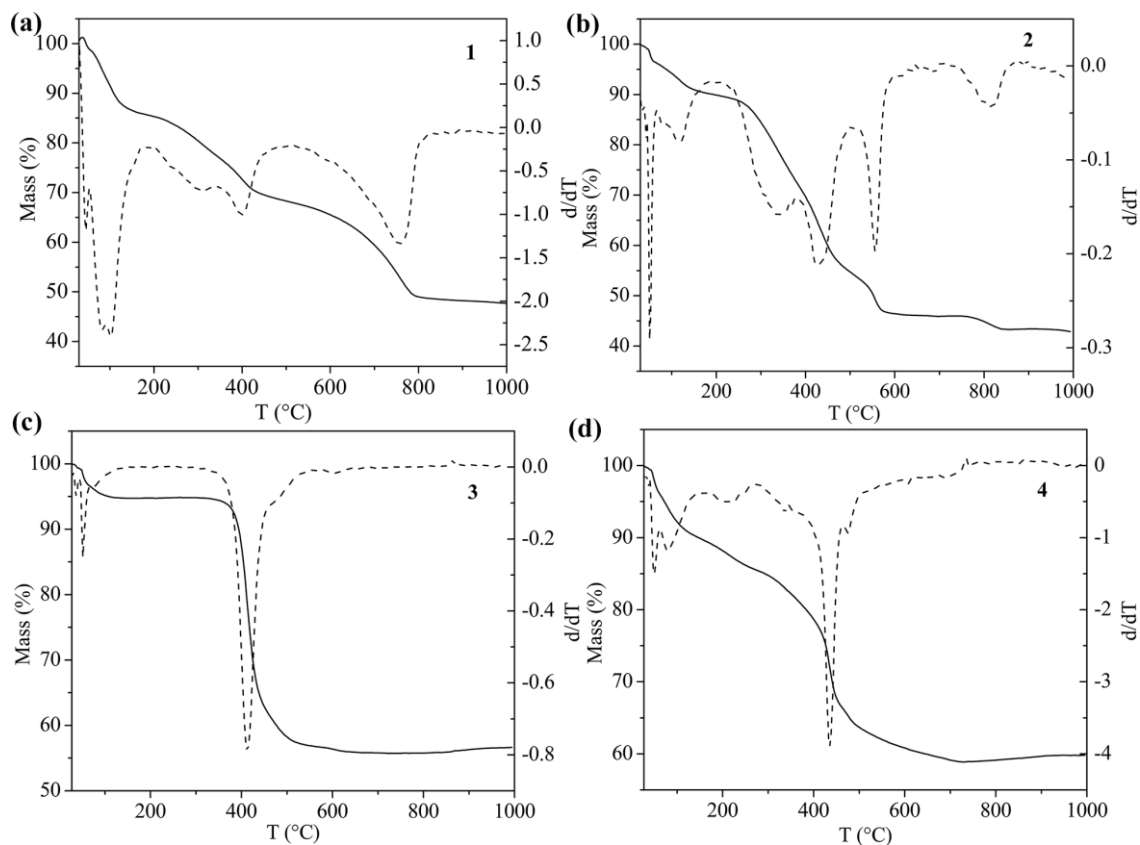

**Fig. S10.** TG-DTG curves of **1** – **4** respectively.

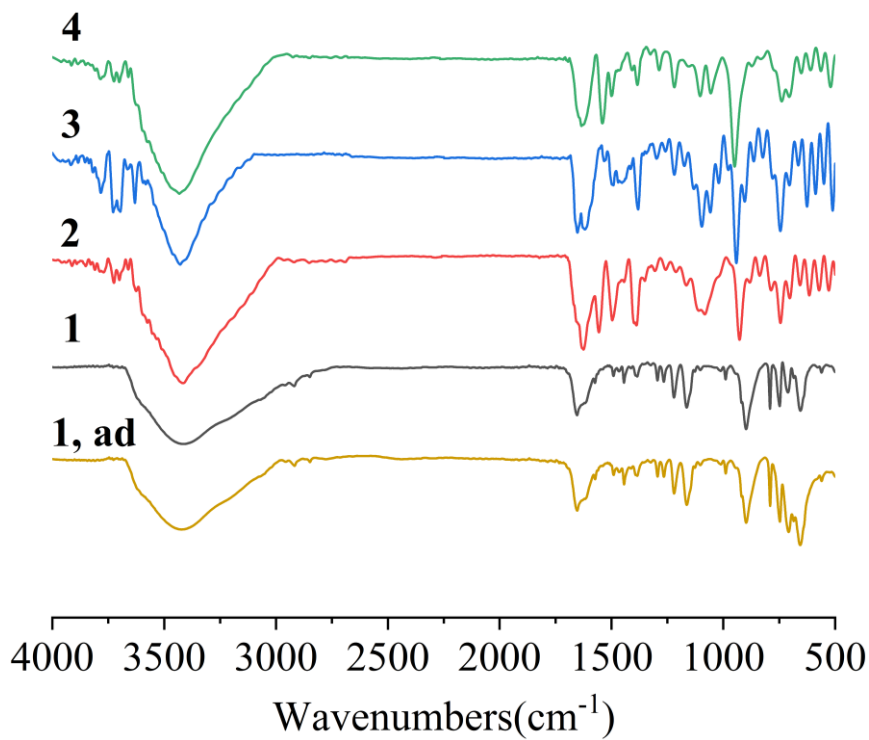

**Fig. S11.** IR spectra of **1(ad)**, **1** – **4** respectively.

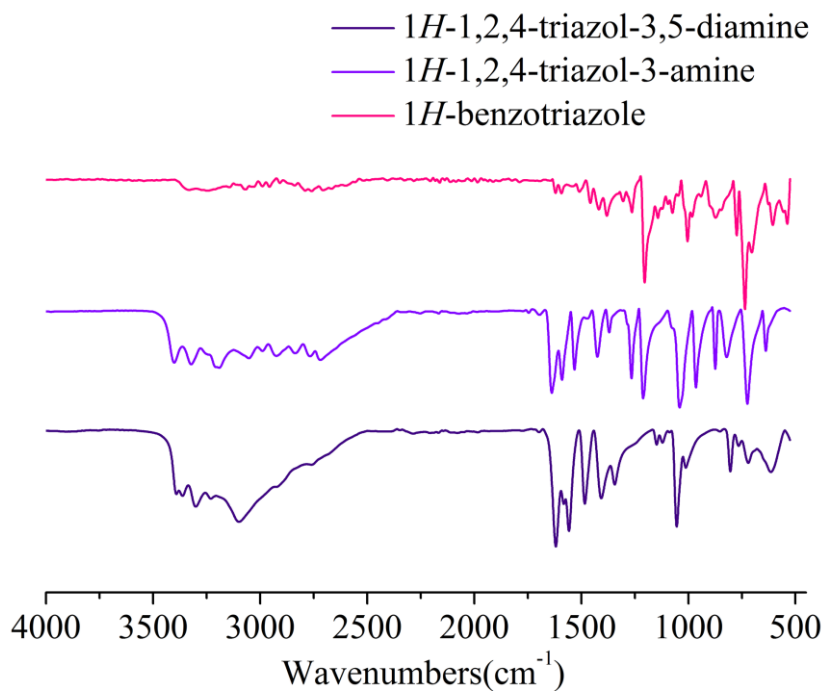

**Fig. S12.** IR spectra of 1H-benzotriazole, 1H-1,2,4-triazol-3-amine and 1H-1,2,4-triazole-3,5-diamine ligands respectively.

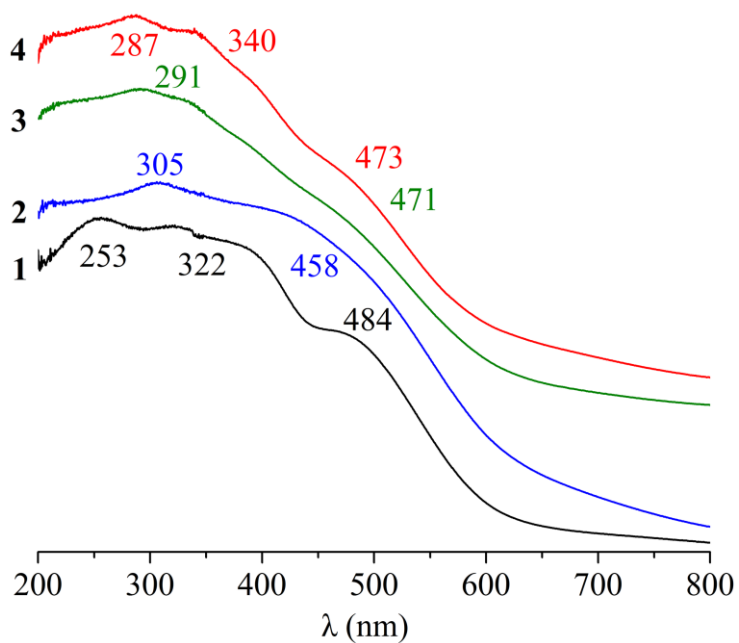

**Fig. S13.** Solid-state UV-vis reflective spectra for **1** – **4** respectively.

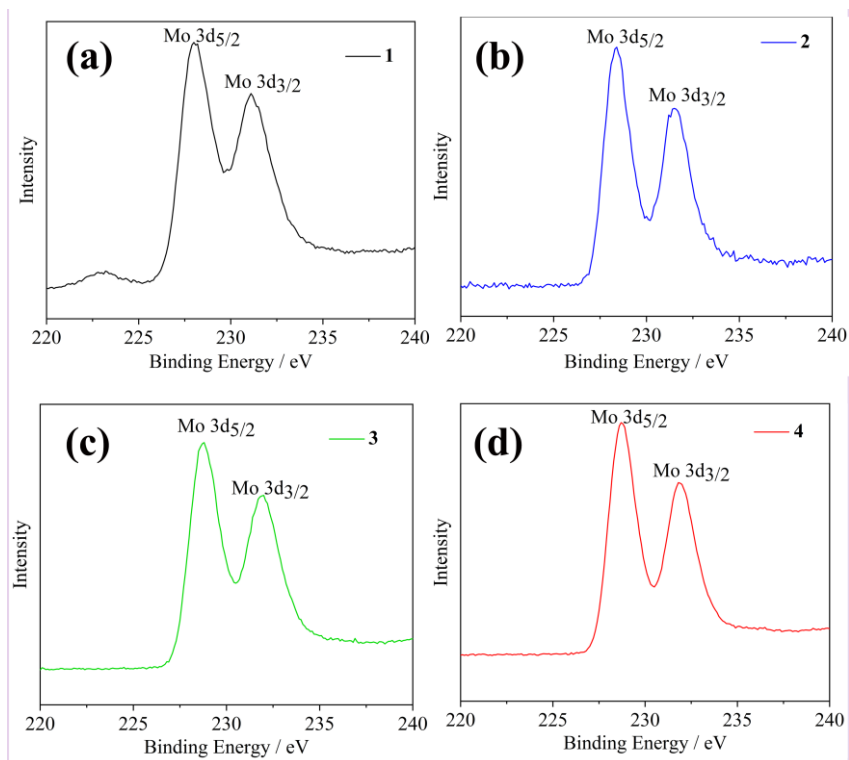

**Fig. S14.** X-ray photoelectron spectra for **1** – **4** respectively.

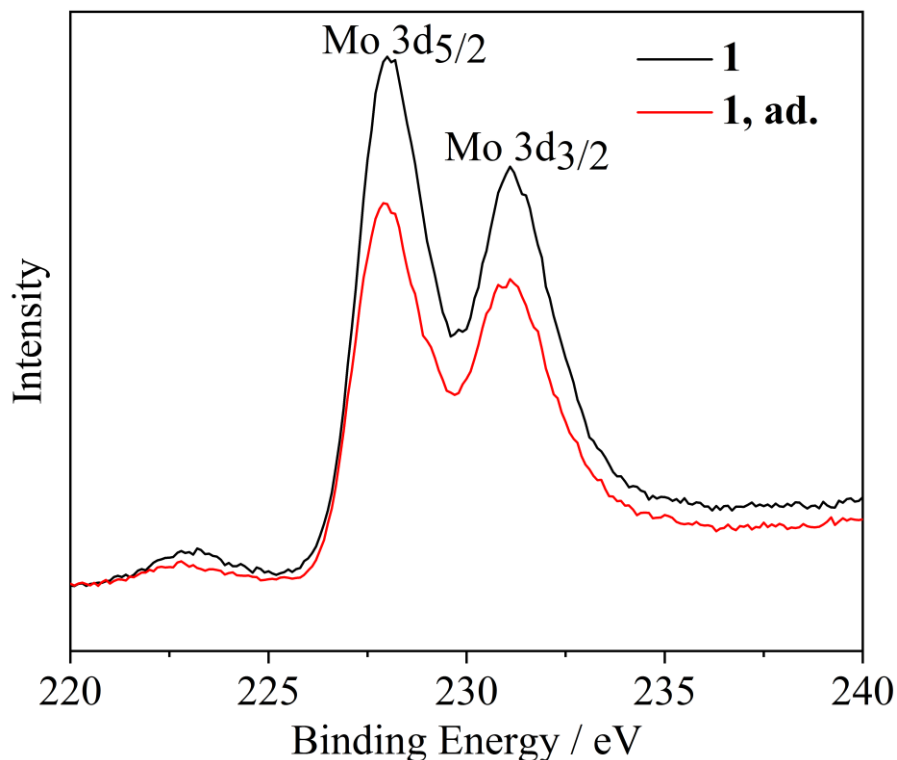

**Fig. S15.** X-ray photoelectron spectroscopy for **1** before and after adsorptions respectively.

#### X-ray photoelectron spectroscopy

Figures S14 and 15 show the X-ray photoelectron spectra of **1** – **4**, especially those of **1** before and after O<sub>2</sub> adsorption experiments. The species of Mo were observed in **1** – **4**, with binding energies of the Mo 3d<sub>5/2</sub> corresponding to 228.0, 228.2, 228.7 and 228.7 eV respectively, where the peaks at 228 ~ 229 eV correspond to Mo(V) in complexes **1** – **4**.<sup>2</sup> The Mo 3d<sub>3/2</sub> photoelectron binding energies of 231.1, 231.3, 232.0 and 231.9 eV also corresponded to Mo(V) for **1** – **4** respectively. Moreover, it can be seen the Mo spectra of 3d<sub>5/2</sub> and 3d<sub>3/2</sub> for compound **1** remain before and after the adsorptions.

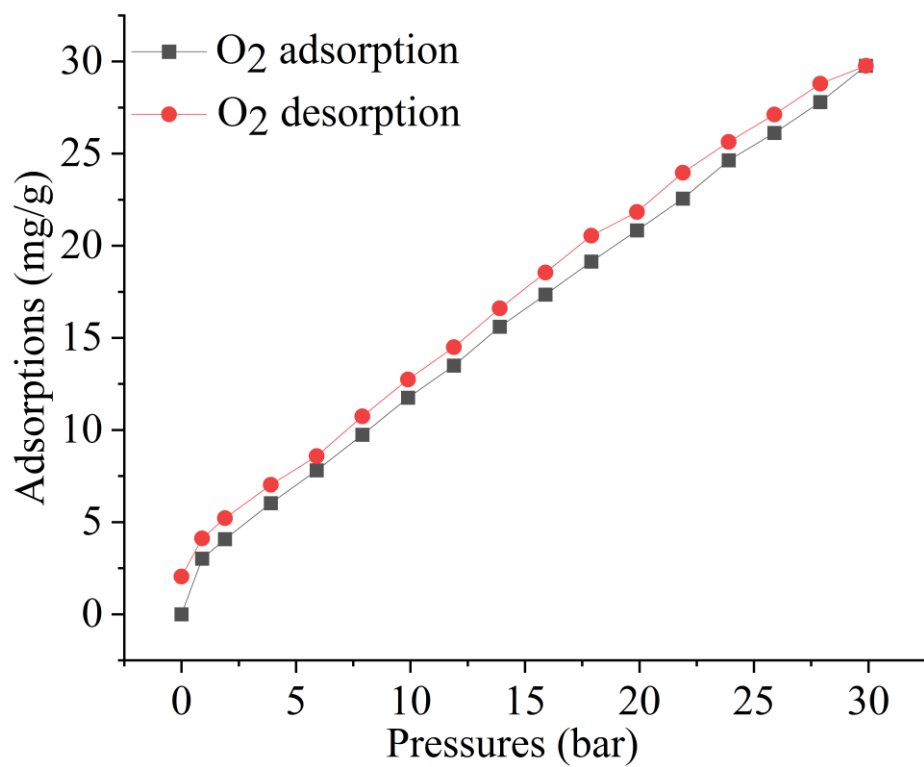

**Fig. S16.** O<sub>2</sub> adsorption and desorption isotherms for **1** at 298K.

**Table S1.** Comparisons of synthetic pH values for **1**, **2**, **3** and **4** with the other Mo<sub>12</sub>, Mo<sub>8</sub> and Mo<sub>6</sub> POMs.

| Categories                                                                           | Complexes                                                                                                                                                                               | Suitable pH values |
|--------------------------------------------------------------------------------------|-----------------------------------------------------------------------------------------------------------------------------------------------------------------------------------------|--------------------|
| Mo <sub>12</sub>                                                                     | Na <sub>4</sub> [Mo <sub>12</sub> O <sub>12</sub> (μ <sub>2</sub> -O) <sub>4</sub> (μ <sub>3</sub> -O) <sub>12</sub> (3-trz) <sub>8</sub> ]·14H <sub>2</sub> O ( <b>3</b> )             | <b>6.0</b>         |
|                                                                                      | Cs <sub>2</sub> [Mo <sub>12</sub> O <sub>12</sub> S <sub>12</sub> (OH) <sub>12</sub> (C <sub>8</sub> H <sub>4</sub> O <sub>4</sub> )]·15H <sub>2</sub> O·6DMF <sup>3</sup>              | 5.0                |
|                                                                                      | K <sub>3</sub> [Mo <sub>12</sub> O <sub>12</sub> S <sub>12</sub> (OH) <sub>12</sub> (C <sub>9</sub> H <sub>3</sub> O <sub>6</sub> )]·22H <sub>2</sub> O <sup>3</sup>                    | 5.5                |
|                                                                                      | Na <sub>4</sub> [(HPO <sub>4</sub> ) <sub>2</sub> Mo <sub>12</sub> S <sub>12</sub> O <sub>12</sub> (OH) <sub>12</sub> (H <sub>2</sub> O) <sub>2</sub> ]·27H <sub>2</sub> O <sup>4</sup> | 5.0                |
|                                                                                      | Cs <sub>2</sub> [Mo <sub>12</sub> S <sub>12</sub> O <sub>12</sub> (OH) <sub>12</sub> (C <sub>7</sub> H <sub>10</sub> O <sub>4</sub> )]·22H <sub>2</sub> O <sup>5</sup>                  | 5.0                |
| Mo <sub>8</sub>                                                                      | [Mo <sub>8</sub> O <sub>8</sub> (μ <sub>2</sub> -O) <sub>12</sub> (Hdatrz) <sub>8</sub> ]·28H <sub>2</sub> O ( <b>2</b> )                                                               | <b>8.9</b>         |
|                                                                                      | Na <sub>8</sub> [Mo <sub>16</sub> O <sub>16</sub> (μ <sub>2</sub> -O) <sub>16</sub> (μ <sub>2</sub> -OH) <sub>16</sub> (3-trz) <sub>8</sub> ]·29H <sub>2</sub> O ( <b>4</b> )           | <b>8.0</b>         |
|                                                                                      | [Cu(bix)][(Cubix)(δ-Mo <sub>8</sub> O <sub>26</sub> ) <sub>0.5</sub> ] <sup>6</sup>                                                                                                     | 3.0                |
|                                                                                      | (H <sub>2</sub> bix) <sub>2</sub> (β-Mo <sub>8</sub> O <sub>26</sub> ) <sub>0.5</sub> (β-Mo <sub>8</sub> O <sub>26</sub> ) <sub>0.5</sub> ·3H <sub>2</sub> O <sup>6</sup>               | 4.0                |
|                                                                                      | [Cu(bpp)][Cu(bpp)(R-Mo <sub>8</sub> O <sub>26</sub> ) <sub>0.5</sub> ]·3H <sub>2</sub> O <sup>6</sup>                                                                                   | 4.5                |
|                                                                                      | [(V <sub>2</sub> O <sub>2</sub> )(H <sub>2</sub> PMo <sub>8</sub> V <sub>4</sub> O <sub>40</sub> )]·2(en)·12H <sub>2</sub> O <sup>7</sup>                                               | 3.7                |
|                                                                                      | (NH <sub>4</sub> ) <sub>5</sub> [Mo <sub>8</sub> (OH) <sub>2</sub> O <sub>24</sub> (μ <sub>8</sub> -PO <sub>4</sub> )](H <sub>2</sub> O) <sub>2</sub> <sup>8</sup>                      | 4.2                |
|                                                                                      | [N(CH <sub>3</sub> ) <sub>4</sub> ] <sub>2</sub> [Mo <sub>8</sub> S <sub>8</sub> O <sub>8</sub> (OH) <sub>8</sub> (C <sub>2</sub> O <sub>4</sub> )]·13H <sub>2</sub> O <sup>5</sup>     | 5.0                |
|                                                                                      | Li <sub>2</sub> [Mo <sub>8</sub> S <sub>8</sub> O <sub>8</sub> (OH) <sub>8</sub> (C <sub>2</sub> O <sub>4</sub> )]·18.5H <sub>2</sub> O <sup>5</sup>                                    | 5.0                |
| (Him) <sub>4</sub> [Mo <sub>8</sub> O <sub>26</sub> (im) <sub>2</sub> ] <sup>9</sup> | 4.7 ~ 5.0                                                                                                                                                                               |                    |
| Mo <sub>6</sub>                                                                      | [Mo <sub>6</sub> O <sub>6</sub> (μ <sub>2</sub> -O) <sub>9</sub> (Hbtz) <sub>6</sub> ]·21H <sub>2</sub> O ( <b>1</b> )                                                                  | <b>10.9</b>        |
|                                                                                      | (NH <sub>4</sub> )Na <sub>2</sub> [As <sup>III</sup> Mo <sub>6</sub> O <sub>21</sub> (O <sub>2</sub> CCH <sub>2</sub> NH <sub>3</sub> ) <sub>3</sub> ]·8H <sub>2</sub> O <sup>10</sup>  | 4.0                |
|                                                                                      | {[Sm(H <sub>2</sub> O) <sub>5</sub> ] <sub>2</sub> (TeMo <sub>6</sub> O <sub>24</sub> )}·6H <sub>2</sub> O <sup>11</sup>                                                                | 2.7                |
|                                                                                      | (H <sub>2</sub> bpp)[Ag{AlMo <sub>6</sub> (OH) <sub>6</sub> O <sub>18</sub> }]·2.5H <sub>2</sub> O <sup>12</sup>                                                                        | 2.4                |

List of abbreviations: DMF = *N,N*-dimethylformamide; bix = 1,4-bis(imidazole-1-ylmethyl)benzene; bpp = 1,3-bis(4-pyridyl)propane; en = ethylenediamine; im = imidazole.

**Table S2.** Crystallographic data and structural refinements for complexes [Mo<sub>6</sub>O<sub>6</sub>(μ<sub>2</sub>-O)<sub>9</sub>(Hbtz)<sub>6</sub>]·21H<sub>2</sub>O (**1**), [Mo<sub>8</sub>O<sub>8</sub>(μ<sub>2</sub>-O)<sub>12</sub>(Hdatrz)<sub>8</sub>]·28H<sub>2</sub>O (**2**), Na<sub>4</sub>[Mo<sub>12</sub>O<sub>12</sub>(μ<sub>2</sub>-O)<sub>4</sub>(μ<sub>3</sub>-O)<sub>12</sub>(3-trz)<sub>8</sub>]·14H<sub>2</sub>O (**3**) and Na<sub>8</sub>[Mo<sub>16</sub>O<sub>16</sub>(μ<sub>2</sub>-O)<sub>16</sub>(μ<sub>2</sub>-OH)<sub>16</sub>(3-trz)<sub>8</sub>]·29H<sub>2</sub>O (**4**) respectively.

| Identification codes                   | <b>1</b>                                                                        | <b>2</b>                                                                        | <b>3</b>                                                                                         | <b>4</b>                                                                                         |
|----------------------------------------|---------------------------------------------------------------------------------|---------------------------------------------------------------------------------|--------------------------------------------------------------------------------------------------|--------------------------------------------------------------------------------------------------|
| Empirical formula                      | C <sub>36</sub> H <sub>31</sub> Mo <sub>6</sub> N <sub>18</sub> O <sub>16</sub> | C <sub>16</sub> H <sub>42</sub> Mo <sub>8</sub> N <sub>40</sub> O <sub>22</sub> | C <sub>16</sub> H <sub>47</sub> Mo <sub>12</sub> N <sub>32</sub> Na <sub>4</sub> O <sub>42</sub> | C <sub>16</sub> H <sub>88</sub> Mo <sub>16</sub> N <sub>32</sub> Na <sub>8</sub> O <sub>77</sub> |
| Formula weight                         | 1547.43                                                                         | 1914.41                                                                         | 2603.09                                                                                          | 3680.14                                                                                          |
| Temperature/K                          | 99.98(1)                                                                        | 99.90(6)                                                                        | 100.00(1)                                                                                        | 100.00(1)                                                                                        |
| Crystal system                         | triclinic                                                                       | monoclinic                                                                      | triclinic                                                                                        | orthorhombic                                                                                     |
| Space group                            | <i>P</i> $\bar{1}$                                                              | <i>C</i> 2/ <i>m</i>                                                            | <i>P</i> $\bar{1}$                                                                               | <i>F</i> <i>ddd</i>                                                                              |
| <i>a</i> /Å                            | 11.1739(2)                                                                      | 18.2829(9)                                                                      | 11.8391(3)                                                                                       | 14.9900(2)                                                                                       |
| <i>b</i> /Å                            | 12.6845(3)                                                                      | 20.7000(9)                                                                      | 11.9219(2)                                                                                       | 31.7213(4)                                                                                       |
| <i>c</i> /Å                            | 27.1349(6)                                                                      | 10.4480(5)                                                                      | 25.7883(6)                                                                                       | 46.9852(6)                                                                                       |
| $\alpha$ /°                            | 83.745(2)                                                                       | 90                                                                              | 98.134(2)                                                                                        | 90                                                                                               |
| $\beta$ /°                             | 81.094(2)                                                                       | 102.276(5)                                                                      | 97.651(2)                                                                                        | 90                                                                                               |
| $\gamma$ /°                            | 84.215(2)                                                                       | 90                                                                              | 91.857(2)                                                                                        | 90                                                                                               |
| Volume/Å <sup>3</sup>                  | 3763.17(1)                                                                      | 3863.7(3)                                                                       | 3566.31(1)                                                                                       | 22341.6(5)                                                                                       |
| <i>Z</i>                               | 2                                                                               | 2                                                                               | 2                                                                                                | 8                                                                                                |
| $\rho_{\text{calc}}$ /cm <sup>3</sup>  | 1.366                                                                           | 1.646                                                                           | 2.424                                                                                            | 2.188                                                                                            |
| $\mu$ /mm <sup>-1</sup>                | 8.442                                                                           | 10.967                                                                          | 17.920                                                                                           | 15.510                                                                                           |
| <i>F</i> (000)                         | 1506.0                                                                          | 1860.0                                                                          | 2502.0                                                                                           | 14272.0                                                                                          |
| Crystal size/mm <sup>3</sup>           | 0.10 × 0.05 × 0.02                                                              | 0.15 × 0.10 × 0.10                                                              | 0.10 × 0.10 × 0.05                                                                               | 0.10 × 0.10 × 0.05                                                                               |
| Radiation (Å)                          | Cu K $\alpha$ ( $\lambda$ = 1.54184)                                            | Cu K $\alpha$ ( $\lambda$ = 1.54184)                                            | Cu K $\alpha$ ( $\lambda$ = 1.54184)                                                             | Cu K $\alpha$ ( $\lambda$ = 1.54184)                                                             |
| 2 $\theta$ range for data collection/° | 6.624 to 148.328                                                                | 6.536 to 128.684                                                                | 6.994 to 142.498                                                                                 | 6.724 to 151.802                                                                                 |

|                                                       |                                                                        |                                                                        |                                                                        |                                                                        |
|-------------------------------------------------------|------------------------------------------------------------------------|------------------------------------------------------------------------|------------------------------------------------------------------------|------------------------------------------------------------------------|
| Index ranges                                          | $-12 \leq h \leq 13,$<br>$-15 \leq k \leq 15,$<br>$-33 \leq l \leq 33$ | $-21 \leq h \leq 21,$<br>$-17 \leq k \leq 24,$<br>$-12 \leq l \leq 12$ | $-14 \leq h \leq 14,$<br>$-13 \leq k \leq 14,$<br>$-31 \leq l \leq 31$ | $-18 \leq h \leq 17,$<br>$-39 \leq k \leq 35,$<br>$-57 \leq l \leq 30$ |
| Reflections collected                                 | 47835                                                                  | 10565                                                                  | 39596                                                                  | 19930                                                                  |
| Independent reflections                               | 14696 ( $R_{\text{int}} = 0.0499,$<br>$R_{\sigma} = 0.0467$ )          | 3261 ( $R_{\text{int}} = 0.0372, R_{\sigma}$<br>$= 0.0379$ )           | 13354 ( $R_{\text{int}} = 0.0398,$<br>$R_{\sigma} = 0.0462$ )          | 5475 ( $R_{\text{int}} = 0.0206,$<br>$R_{\sigma} = 0.0196$ )           |
| Data/restraints/parameters                            | 14696/250/628                                                          | 3261/2/203                                                             | 13354/7/856                                                            | 5475/78/302                                                            |
| Goodness-of-fit on $F^2$                              | 1.051                                                                  | 1.059                                                                  | 1.037                                                                  | 1.048                                                                  |
| Final $R$ indexes [ $I \geq 2\sigma$<br>( $I$ )]      | $R_1 = 0.0789,$<br>$wR_2 = 0.2210$                                     | $R_1 = 0.0421,$<br>$wR_2 = 0.1234$                                     | $R_1 = 0.0764,$<br>$wR_2 = 0.1987$                                     | $R_1 = 0.0434,$<br>$wR_2 = 0.1331$                                     |
| Final $R$ indexes [all data]                          | $R_1 = 0.0892,$<br>$wR_2 = 0.2310$                                     | $R_1 = 0.0475,$<br>$wR_2 = 0.1270$                                     | $R_1 = 0.0903,$<br>$wR_2 = 0.2098$                                     | $R_1 = 0.0461,$<br>$wR_2 = 0.1357$                                     |
| Largest diff.<br>peak/hole/ $e \cdot \text{\AA}^{-3}$ | 1.71/-1.49                                                             | 1.19/-0.96                                                             | 2.03/-1.20                                                             | 1.21/-1.40                                                             |



**Table S3.** Selected bond distances ( Å ) and angles ( ° ) in  $[\text{Mo}_6\text{O}_6(\mu_2\text{-O})_9(\text{Hbtz})_6]\cdot 21\text{H}_2\text{O}$  (**1**).

| Atom–Atom | Length/Å  | Atom–Atom | Distances/Å |
|-----------|-----------|-----------|-------------|
| Mo1–Mo2   | 2.5919(7) | Mo3–Mo4   | 2.5725(1)   |
| Mo1–O1    | 1.706(5)  | Mo3–O4    | 1.945(5)    |
| Mo1–O2    | 2.059(5)  | Mo3–O8    | 2.000(7)    |
| Mo1–O3    | 1.977(5)  | Mo3–O10   | 1.963(7)    |
| Mo1–O7    | 1.971(6)  | Mo3–N2    | 2.246(6)    |
| Mo1–N16   | 2.243(6)  | Mo3–N5    | 2.252(8)    |
| Mo1–N13   | 2.220(6)  | Mo3–O13   | 1.721(6)    |
| Mo2–O3    | 1.985(6)  | Mo5–O6    | 1.974(6)    |
| Mo2–O4    | 2.028(5)  | Mo5–O9    | 1.932(6)    |
| Mo2–O5    | 1.711(5)  | Mo5–O11   | 1.960(7)    |
| Mo2–O7    | 1.964(5)  | Mo5–O15   | 1.726(7)    |
| Mo2–N1    | 2.233(7)  | Mo5–N7    | 2.228(1)    |
| Mo2–N4    | 2.236(6)  | Mo5–N10   | 2.229(8)    |
| Mo6–Mo5   | 2.5672(9) | Mo4–O8    | 2.001(7)    |
| Mo6–O2    | 1.941(5)  | Mo4–O9    | 1.961(6)    |
| Mo6–O6    | 1.965(6)  | Mo4–O10   | 1.975(6)    |
| Mo6–O11   | 1.949(6)  | Mo4–O14   | 1.708(7)    |
| Mo6–N14   | 2.268(7)  | Mo4–N11   | 2.275(8)    |
| Mo6–O12   | 1.720(6)  | Mo4–N8    | 2.234(1)    |
| Mo6–N17   | 2.260(7)  |           |             |

  

| Atom–Atom–Atom | Angle/°   | Atom–Atom–Atom | Angle/°   |
|----------------|-----------|----------------|-----------|
| O1–Mo1–Mo2     | 105.64(1) | O4–Mo3–N5      | 75.8(2)   |
| O1–Mo1–O2      | 159.5(2)  | O8–Mo3–Mo4     | 50.02(2)  |
| O1–Mo1–O3      | 104.5(2)  | O8–Mo3–N2      | 168.3(2)  |
| O1–Mo1–O7      | 105.2(2)  | O8–Mo3–N5      | 89.3(3)   |
| O1–Mo1–N16     | 88.9(2)   | O10–Mo3–Mo4    | 49.42(2)  |
| O1–Mo1–N13     | 88.9(2)   | O10–Mo3–O8     | 99.2(3)   |
| O2–Mo1–Mo2     | 94.81(1)  | O10–Mo3–N2     | 86.0(2)   |
| O2–Mo1–N16     | 75.9(2)   | O10–Mo3–N5     | 166.1(2)  |
| O2–Mo1–N13     | 75.6(2)   | N2–Mo3–Mo4     | 135.10(2) |
| O3–Mo1–Mo2     | 49.27(2)  | N2–Mo3–N5      | 83.7(3)   |
| O3–Mo1–O2      | 89.0(2)   | N5–Mo3–Mo4     | 138.91(2) |
| O3–Mo1–N16     | 88.9(2)   | O13–Mo3–Mo4    | 105.4(2)  |
| O3–Mo1–N13     | 163.4(2)  | O13–Mo3–O4     | 156.1(3)  |
| O7–Mo1–Mo2     | 48.69(1)  | O13–Mo3–O8     | 102.7(3)  |
| O7–Mo1–O2      | 87.9(2)   | O13–Mo3–O10    | 101.9(3)  |
| O7–Mo1–O3      | 97.2(2)   | O13–Mo3–N2     | 86.3(3)   |
| O7–Mo1–N16     | 162.5(2)  | O13–Mo3–N5     | 86.8(3)   |
| O7–Mo1–N13     | 88.5(2)   | O6–Mo5–Mo6     | 49.17(2)  |
| N16–Mo1–Mo2    | 137.72(1) | O6–Mo5–N7      | 166.2(4)  |
| N13–Mo1–Mo2    | 136.82(2) | O6–Mo5–N10     | 88.0(3)   |
| N13–Mo1–N16    | 81.5(2)   | O9–Mo5–Mo6     | 95.23(2)  |
| O3–Mo2–Mo1     | 49.01(1)  | O9–Mo5–O6      | 90.4(2)   |

|             |           |             |          |
|-------------|-----------|-------------|----------|
| O3–Mo2–O4   | 89.3(2)   | O9–Mo5–O11  | 91.0(2)  |
| O3–Mo2–N1   | 164.5(2)  | O9–Mo5–N7   | 76.3(4)  |
| O3–Mo2–N4   | 89.0(2)   | O9–Mo5–N10  | 77.0(3)  |
| O4–Mo2–Mo1  | 95.24(1)  | O11–Mo5–Mo6 | 48.77(2) |
| O4–Mo2–N1   | 76.1(2)   | O11–Mo5–O6  | 97.7(2)  |
| O4–Mo2–N4   | 76.5(2)   | O11–Mo5–N7  | 86.4(4)  |
| O5–Mo2–Mo1  | 105.83(2) | O11–Mo5–N10 | 166.8(3) |
| O5–Mo2–O3   | 104.8(2)  | O15–Mo5–Mo6 | 106.6(3) |
| O5–Mo2–O4   | 158.9(2)  | O15–Mo5–O6  | 103.8(3) |
| O5–Mo2–O7   | 105.1(2)  | O15–Mo5–O9  | 158.2(3) |
| O5–Mo2–N1   | 87.9(2)   | O15–Mo5–O11 | 103.2(3) |
| O5–Mo2–N4   | 88.0(2)   | O15–Mo5–N7  | 88.0(5)  |
| O7–Mo2–Mo1  | 48.93(2)  | O15–Mo5–N10 | 86.8(3)  |
| O7–Mo2–O3   | 97.2(2)   | N7–Mo5–Mo6  | 134.7(4) |
| O7–Mo2–O4   | 88.2(2)   | N7–Mo5–N10  | 85.4(4)  |
| O7–Mo2–N1   | 87.8(2)   | N10–Mo5–Mo6 | 136.8(2) |
| O7–Mo2–N4   | 163.4(2)  | O8–Mo4–Mo3  | 49.96(2) |
| N1–Mo2–Mo1  | 136.44(2) | O8–Mo4–N11  | 88.0(3)  |
| N1–Mo2–N4   | 82.5(2)   | O8–Mo4–N8   | 165.6(4) |
| N4–Mo2–Mo1  | 137.68(2) | O9–Mo4–Mo3  | 95.81(1) |
| O2–Mo6–Mo5  | 98.17(2)  | O9–Mo4–O8   | 90.8(2)  |
| O2–Mo6–O6   | 92.4(2)   | O9–Mo4–O10  | 91.9(2)  |
| O2–Mo6–O11  | 92.8(2)   | O9–Mo4–N11  | 75.9(3)  |
| O2–Mo6–N14  | 76.1(2)   | O9–Mo4–N8   | 75.8(4)  |
| O2–Mo6–N17  | 74.9(2)   | O10–Mo4–Mo3 | 49.00(2) |
| O6–Mo6–Mo5  | 49.48(2)  | O10–Mo4–O8  | 98.8(3)  |
| O6–Mo6–N14  | 167.4(2)  | O10–Mo4–N11 | 166.2(3) |
| O6–Mo6–N17  | 88.2(2)   | O10–Mo4–N8  | 87.1(4)  |
| O11–Mo6–Mo5 | 49.15(2)  | O14–Mo4–Mo3 | 107.3(3) |
| O11–Mo6–O6  | 98.4(3)   | O14–Mo4–O8  | 104.2(3) |
| O11–Mo6–N14 | 87.5(3)   | O14–Mo4–O9  | 156.9(3) |
| O11–Mo6–N17 | 166.3(2)  | O14–Mo4–O10 | 102.9(3) |
| N14–Mo6–Mo5 | 136.31(2) | O14–Mo4–N11 | 87.0(3)  |
| O12–Mo6–Mo5 | 106.0(2)  | O14–Mo4–N8  | 87.2(5)  |
| O12–Mo6–O2  | 155.8(3)  | N11–Mo4–Mo3 | 137.4(2) |
| O12–Mo6–O6  | 102.6(3)  | N8–Mo4–Mo3  | 135.5(4) |
| O12–Mo6–O11 | 103.5(3)  | N8–Mo4–N11  | 83.7(4)  |
| O12–Mo6–N14 | 86.7(3)   | Mo6–O2–Mo1  | 132.0(3) |
| O12–Mo6–N17 | 86.6(3)   | Mo1–O3–Mo2  | 81.7(2)  |
| N17–Mo6–Mo5 | 137.29(2) | Mo3–O4–Mo2  | 132.3(3) |
| N17–Mo6–N14 | 83.9(2)   | Mo6–O6–Mo5  | 81.4(2)  |
| O4–Mo3–Mo4  | 98.45(1)  | Mo2–O7–Mo1  | 82.4(2)  |
| O4–Mo3–O8   | 93.5(2)   | Mo3–O8–Mo4  | 80.0(3)  |
| O4–Mo3–O10  | 92.6(2)   | Mo5–O9–Mo4  | 133.5(3) |
| O4–Mo3–N2   | 75.7(2)   | Mo3–O10–Mo4 | 81.6(2)  |

---

**Table S4.** Selected hydrogen bond distances (Å) and angles (°) in [Mo<sub>6</sub>O<sub>6</sub>(μ<sub>2</sub>-O)<sub>9</sub>(Hbtz)<sub>6</sub>] $\cdot$ 21H<sub>2</sub>O (**1**).

|       | D–H $\cdots$ A                    | D–H(Å) | H $\cdots$ A(Å) | D $\cdots$ A(Å) | D–H $\cdots$ A(°) |
|-------|-----------------------------------|--------|-----------------|-----------------|-------------------|
|       | O1w–H1w $\cdots$ O13              | 0.87   | 1.81            | 2.371(8)        | 121               |
|       | N3–H3 $\cdots$ O1w                | 0.88   | 1.65            | 2.447(8)        | 149               |
|       | N18–H18 $\cdots$ O1w <sup>a</sup> | 0.88   | 1.69            | 2.467(7)        | 145               |
| Intra | C9–H9 $\cdots$ O5                 | 0.95   | 2.59            | 3.162(1)        | 119               |
|       | C22–H22 $\cdots$ N9 <sup>b</sup>  | 0.95   | 2.62            | 3.560(2)        | 167               |
| Intra | C27–H27 $\cdots$ O1               | 0.95   | 2.56            | 3.147(9)        | 120               |
| Intra | C33–H33 $\cdots$ O1               | 0.95   | 2.60            | 3.179(9)        | 120               |

Symmetry codes: (a)  $x, -1 + y, z$ ; (b)  $1 - x, 1 - y, 1 - z$ .

**Table S5.** Selected bond distances ( Å ) and angles ( ° ) in [Mo<sub>8</sub>O<sub>8</sub>(μ<sub>2</sub>-O)<sub>12</sub>(Hdatrz)<sub>8</sub>] $\cdot$ 28H<sub>2</sub>O (2).

| <b>Atom–Atom</b> | <b>Length/Å</b> | <b>Atom–Atom</b>    | <b>Length/Å</b> |
|------------------|-----------------|---------------------|-----------------|
| Mo1–Mo2          | 2.5639(6)       | Mo2–O5              | 2.195(3)        |
| Mo1–O3           | 2.155(2)        | Mo2–O1              | 1.941(4)        |
| Mo1–O1           | 1.946(4)        | Mo2–O2              | 1.951(4)        |
| Mo1–O2           | 1.954(4)        | Mo2–O6              | 1.702(4)        |
| Mo1–O4           | 1.701(4)        | Mo2–N4              | 2.137(5)        |
| Mo1–N9           | 2.182(4)        | Mo2–N5 <sup>1</sup> | 2.195(5)        |
| Mo1–N1           | 2.167(5)        |                     |                 |

  

| <b>Atom–Atom–Atom</b>  | <b>Angle/°</b> | <b>Atom–Atom–Atom</b>    | <b>Angle/°</b> |
|------------------------|----------------|--------------------------|----------------|
| O3–Mo1–Mo2             | 104.2(1)       | O1–Mo2–Mo1               | 48.8(1)        |
| O3–Mo1–N9              | 77.41(7)       | O1–Mo2–O5                | 86.56(3)       |
| O3–Mo1–N1              | 74.59(7)       | O1–Mo2–O2                | 93.67(6)       |
| O1–Mo1–Mo2             | 48.64(1)       | O1–Mo2–N4                | 161.83(6)      |
| O1–Mo1–O3              | 88.42(6)       | O1–Mo2–N5 <sup>1</sup>   | 86.60(7)       |
| O1–Mo1–O2              | 93.41(6)       | O2–Mo2–Mo1               | 49.02(1)       |
| O1–Mo1–N9              | 86.09(6)       | O2–Mo2–O5                | 92.27(4)       |
| O1–Mo1–N1              | 163.01(6)      | O2–Mo2–N4                | 84.47(7)       |
| O2–Mo1–Mo2             | 48.91(2)       | O2–Mo2–N5 <sup>1</sup>   | 168.27(7)      |
| O2–Mo1–O3              | 89.00(7)       | O6–Mo2–Mo1               | 96.72(2)       |
| O2–Mo1–N9              | 166.41(6)      | O6–Mo2–O5                | 157.76(7)      |
| O2–Mo1–N1              | 86.10(8)       | O6–Mo2–O1                | 105.84(7)      |
| O4–Mo1–Mo2             | 97.78(3)       | O6–Mo2–O2                | 104.98(8)      |
| O4–Mo1–O3              | 158.04(7)      | O6–Mo2–N4                | 92.06(8)       |
| O4–Mo1–O1              | 106.29(7)      | O6–Mo2–N5 <sup>1</sup>   | 86.17(8)       |
| O4–Mo1–O2              | 105.89(7)      | N4–Mo2–Mo1               | 133.38(3)      |
| O4–Mo1–N9              | 87.22(7)       | N4–Mo2–O5                | 75.48(4)       |
| O4–Mo1–N1              | 90.12(8)       | N4–Mo2–N5 <sup>1</sup>   | 91.62(7)       |
| N9–Mo1–Mo2             | 134.14(2)      | N5 <sup>1</sup> –Mo2–Mo1 | 134.50(3)      |
| N1–Mo1–Mo2             | 134.83(4)      | Mo1–O3–Mo1 <sup>2</sup>  | 120.5(2)       |
| N1–Mo1–N9              | 90.42(8)       | Mo2 <sup>1</sup> –O5–Mo2 | 118.3(2)       |
| O5–Mo2–Mo1             | 105.24(1)      | Mo2–O1–Mo1               | 82.55(5)       |
| O5–Mo2–N5 <sup>1</sup> | 76.03(5)       | Mo2–O2–Mo1               | 82.07(5)       |

Symmetric codes: <sup>1</sup>1 – x, y, <sup>2</sup>1 – z; x, 1 – y, z.

**Table S6.** Selected hydrogen bond distances (Å) and angles (°) in [Mo<sub>8</sub>O<sub>8</sub>(μ<sub>2</sub>-O)<sub>12</sub>(Hdatrz)<sub>8</sub>] $\cdot$ 28H<sub>2</sub>O (**2**).

|       | D-H $\cdots$ A                   | D-H(Å) | H $\cdots$ A(Å) | D $\cdots$ A(Å) | D-H $\cdots$ A(°) |
|-------|----------------------------------|--------|-----------------|-----------------|-------------------|
|       | O1w-H1w $\cdots$ N10             | 0.87   | 2.17            | 2.798(9)        | 128               |
|       | O1w-H1w $\cdots$ O3 <sup>a</sup> | 0.87   | 2.52            | 2.865(8)        | 105               |
|       | N3-H3A $\cdots$ N7 <sup>b</sup>  | 0.88   | 2.48            | 3.260(9)        | 149               |
|       | N7-H7A $\cdots$ O4 <sup>b</sup>  | 0.88   | 2.35            | 3.055(7)        | 138               |
|       | N7-H7A $\cdots$ O6 <sup>b</sup>  | 0.88   | 2.54            | 3.093(7)        | 122               |
| Intra | N7-H7B $\cdots$ O2               | 0.88   | 2.56            | 3.090(7)        | 120               |
| Intra | N8-H8B $\cdots$ O6 <sup>c</sup>  | 0.90   | 2.33            | 3.063(8)        | 140               |
|       | N10-H10 $\cdots$ O1w             | 0.88   | 1.94            | 2.798(9)        | 166               |
| Intra | N11-H11A $\cdots$ O4             | 0.88   | 2.44            | 3.133(7)        | 137               |

Symmetry codes: (a)  $1 - x, y, 2 - z$ ; (b)  $\frac{1}{2} - x, \frac{3}{2} - y, 1 - z$ ; (c)  $1 - x, y, 1 - z$ .

**Table S7.** Selected bond distances ( Å ) and angles ( ° ) in  $\text{Na}_4[\text{Mo}_{12}\text{O}_{12}(\mu_2\text{-O})_4(\mu_3\text{-O})_{12}(3\text{-trz})_8]\cdot 14\text{H}_2\text{O}$  (**3**).

| Atom–Atom | Length/Å  | Atom–Atom | Length/Å  |
|-----------|-----------|-----------|-----------|
| Mo11–Mo12 | 2.5806(1) | Mo10–N25  | 2.188(1)  |
| Mo11–O5   | 1.969(8)  | Mo3–O7    | 1.950(8)  |
| Mo11–O8   | 1.965(9)  | Mo3–O4    | 2.131(1)  |
| Mo11–O4   | 1.982(9)  | Mo3–O12   | 1.924(9)  |
| Mo11–O10  | 2.286(8)  | Mo3–O17   | 2.216(1)  |
| Mo11–O23  | 1.690(9)  | Mo3–O22   | 1.672(1)  |
| Mo11–N6   | 2.154(1)  | Mo3–N14   | 2.191(1)  |
| Mo4–Mo3   | 2.5783(1) | Mo8–Mo7   | 2.5869(2) |
| Mo4–O2    | 1.994(9)  | Mo8–O2    | 2.061(8)  |
| Mo4–O5    | 2.286(8)  | Mo8–O9    | 1.980(9)  |
| Mo4–O7    | 1.970(8)  | Mo8–O11   | 1.976(8)  |
| Mo4–O12   | 1.973(9)  | Mo8–O24   | 1.697(9)  |
| Mo4–O15   | 1.661(1)  | Mo8–N18   | 2.176(1)  |
| Mo4–N21   | 2.164(1)  | Mo8–N22   | 2.167(1)  |
| Mo6–Mo5   | 2.5748(1) | Mo9–O10   | 1.962(8)  |
| Mo6–O2    | 2.103(8)  | Mo9–O1    | 2.101(1)  |
| Mo6–O6    | 1.974(9)  | Mo9–O13   | 2.213(9)  |
| Mo6–O9    | 2.217(8)  | Mo9–O14   | 1.904(1)  |
| Mo6–O20   | 1.701(9)  | Mo9–O19   | 1.692(1)  |
| Mo6–O21   | 1.916(9)  | Mo9–N2    | 2.185(1)  |
| Mo6–N17   | 2.156(1)  | Mo7–O3    | 2.078(8)  |
| Mo12–O5   | 1.958(8)  | Mo7–O9    | 1.972(8)  |
| Mo12–O3   | 2.091(9)  | Mo7–O11   | 1.985(9)  |
| Mo12–O8   | 1.914(8)  | Mo7–O26   | 1.689(1)  |
| Mo12–O11  | 2.215(8)  | Mo7–N29   | 2.196(1)  |
| Mo12–O16  | 1.692(9)  | Mo7–N26   | 2.088(2)  |
| Mo12–N30  | 2.198(1)  | Mo1–Mo2   | 2.5914(2) |
| Mo5–O6    | 1.975(8)  | Mo1–O1    | 2.055(9)  |
| Mo5–O7    | 2.300(7)  | Mo1–O13   | 1.982(1)  |
| Mo5–O1    | 2.003(9)  | Mo1–O17   | 1.971(1)  |
| Mo5–O21   | 1.943(9)  | Mo1–N9    | 2.130(1)  |
| Mo5–O25   | 1.666(9)  | Mo1–O27   | 1.663(1)  |
| Mo5–N10   | 2.172(1)  | Mo1–N1    | 2.201(1)  |
| Mo10–Mo9  | 2.5760(1) | Mo2–O4    | 2.059(9)  |
| Mo10–O6   | 2.271(8)  | Mo2–O13   | 1.940(1)  |
| Mo10–O3   | 1.992(9)  | Mo2–O17   | 1.987(1)  |
| Mo10–O10  | 1.961(8)  | Mo2–O28   | 1.676(1)  |
| Mo10–O14  | 1.974(9)  | Mo2–N5    | 2.143(1)  |
| Mo10–O18  | 1.686(9)  | Mo2–N13   | 2.143(2)  |

| <b>Atom–Atom–Atom</b> | <b>Angle/°</b> | <b>Atom–Atom–Atom</b> | <b>Angle/°</b> |
|-----------------------|----------------|-----------------------|----------------|
| O5–Mo11–Mo12          | 48.7(2)        | N14–Mo3–O17           | 78.8(5)        |
| O5–Mo11–O4            | 91.0(3)        | O2–Mo8–Mo7            | 97.7(3)        |
| O5–Mo11–O10           | 82.3(3)        | O2–Mo8–N18            | 78.1(4)        |
| O5–Mo11–N6            | 163.6(4)       | O2–Mo8–N22            | 81.0(4)        |
| O8–Mo11–Mo12          | 47.5(2)        | O9–Mo8–Mo7            | 49.0(2)        |
| O8–Mo11–O5            | 94.7(3)        | O9–Mo8–O2             | 75.9(3)        |
| O8–Mo11–O4            | 154.3(4)       | O9–Mo8–N18            | 82.9(4)        |
| O8–Mo11–O10           | 78.7(3)        | O9–Mo8–N22            | 156.6(4)       |
| O8–Mo11–N6            | 86.2(4)        | O11–Mo8–Mo7           | 49.4(3)        |
| O4–Mo11–Mo12          | 138.2(2)       | O11–Mo8–O2            | 94.7(3)        |
| O4–Mo11–O10           | 77.3(3)        | O11–Mo8–O9            | 94.8(4)        |
| O4–Mo11–N6            | 81.5(4)        | O11–Mo8–N18           | 172.8(4)       |
| O10–Mo11–Mo12         | 85.48(2)       | O11–Mo8–N22           | 83.7(4)        |
| O23–Mo11–Mo12         | 99.2(3)        | O24–Mo8–Mo7           | 102.0(4)       |
| O23–Mo11–O5           | 103.3(4)       | O24–Mo8–O2            | 159.4(4)       |
| O23–Mo11–O8           | 101.9(4)       | O24–Mo8–O9            | 113.3(4)       |
| O23–Mo11–O4           | 101.1(4)       | O24–Mo8–O11           | 102.6(4)       |
| O23–Mo11–O10          | 174.2(4)       | O24–Mo8–N18           | 84.6(4)        |
| O23–Mo11–N6           | 92.5(4)        | O24–Mo8–N22           | 89.7(5)        |
| N6–Mo11–Mo12          | 133.5(3)       | N18–Mo8–Mo7           | 130.4(3)       |
| N6–Mo11–O10           | 81.8(4)        | N22–Mo8–Mo7           | 132.9(3)       |
| O2–Mo4–Mo3            | 138.2(2)       | N22–Mo8–N18           | 95.7(4)        |
| O2–Mo4–O5             | 77.9(3)        | O10–Mo9–Mo10          | 48.9(2)        |
| O2–Mo4–N21            | 81.3(4)        | O10–Mo9–O1            | 87.7(3)        |
| O5–Mo4–Mo3            | 85.41(2)       | O10–Mo9–O13           | 94.6(3)        |
| O7–Mo4–Mo3            | 48.5(2)        | O10–Mo9–N2            | 164.2(4)       |
| O7–Mo4–O2             | 91.0(3)        | O1–Mo9–Mo10           | 101.1(2)       |
| O7–Mo4–O5             | 82.3(3)        | O1–Mo9–O13            | 70.0(4)        |
| O7–Mo4–O12            | 94.8(3)        | O1–Mo9–N2             | 76.4(4)        |
| O7–Mo4–N21            | 162.8(4)       | O13–Mo9–Mo10          | 143.4(2)       |
| O12–Mo4–Mo3           | 47.8(3)        | O14–Mo9–Mo10          | 49.5(3)        |
| O12–Mo4–O2            | 154.9(3)       | O14–Mo9–O10           | 97.0(4)        |
| O12–Mo4–O5            | 78.7(3)        | O14–Mo9–O1            | 94.2(4)        |
| O12–Mo4–N21           | 86.1(4)        | O14–Mo9–O13           | 160.0(4)       |
| O15–Mo4–Mo3           | 99.5(3)        | O14–Mo9–N2            | 84.3(4)        |
| O15–Mo4–O2            | 99.8(4)        | O19–Mo9–Mo10          | 102.7(4)       |
| O15–Mo4–O5            | 174.5(4)       | O19–Mo9–O10           | 103.8(4)       |
| O15–Mo4–O7            | 102.9(4)       | O19–Mo9–O1            | 155.5(4)       |
| O15–Mo4–O12           | 102.6(4)       | O19–Mo9–O13           | 87.4(5)        |
| O15–Mo4–N21           | 93.6(4)        | O19–Mo9–O14           | 105.5(5)       |
| N21–Mo4–Mo3           | 133.7(3)       | O19–Mo9–N2            | 90.9(5)        |

|               |          |             |          |
|---------------|----------|-------------|----------|
| N21–Mo4–O5    | 81.1(3)  | N2–Mo9–Mo10 | 133.8(3) |
| O2–Mo6–Mo5    | 101.4(2) | N2–Mo9–O13  | 80.2(4)  |
| O2–Mo6–O9     | 70.2(3)  | O3–Mo7–Mo8  | 98.7(2)  |
| O2–Mo6–N17    | 75.5(4)  | O3–Mo7–N29  | 76.8(4)  |
| O6–Mo6–Mo5    | 49.3(2)  | O3–Mo7–N26  | 80.7(4)  |
| O6–Mo6–O2     | 87.3(3)  | O9–Mo7–Mo8  | 49.2(3)  |
| O6–Mo6–O9     | 94.9(3)  | O9–Mo7–O3   | 95.8(3)  |
| O6–Mo6–N17    | 162.8(4) | O9–Mo7–O11  | 94.8(4)  |
| O9–Mo6–Mo5    | 144.2(2) | O9–Mo7–N29  | 172.3(4) |
| O20–Mo6–Mo5   | 102.3(3) | O9–Mo7–N26  | 84.3(4)  |
| O20–Mo6–O2    | 155.7(4) | O11–Mo7–Mo8 | 49.1(2)  |
| O20–Mo6–O6    | 103.9(4) | O11–Mo7–O3  | 76.2(3)  |
| O20–Mo6–O9    | 87.2(4)  | O11–Mo7–N29 | 81.7(4)  |
| O20–Mo6–O21   | 104.1(4) | O11–Mo7–N26 | 156.7(4) |
| O20–Mo6–N17   | 92.3(4)  | O26–Mo7–Mo8 | 101.5(4) |
| O21–Mo6–Mo5   | 48.6(3)  | O26–Mo7–O3  | 158.2(5) |
| O21–Mo6–O2    | 95.8(3)  | O26–Mo7–O9  | 103.4(4) |
| O21–Mo6–O6    | 96.6(4)  | O26–Mo7–O11 | 111.7(5) |
| O21–Mo6–O9    | 161.4(4) | O26–Mo7–N29 | 84.2(5)  |
| O21–Mo6–N17   | 84.7(4)  | O26–Mo7–N26 | 91.0(5)  |
| N17–Mo6–Mo5   | 133.0(3) | N29–Mo7–Mo8 | 129.3(4) |
| N17–Mo6–O9    | 80.0(4)  | N26–Mo7–Mo8 | 133.5(3) |
| O5–Mo12–Mo11  | 49.1(2)  | N26–Mo7–N29 | 96.1(5)  |
| O5–Mo12–O3    | 87.6(3)  | O1–Mo1–Mo2  | 98.1(2)  |
| O5–Mo12–O11   | 95.2(3)  | O1–Mo1–N9   | 81.3(4)  |
| O5–Mo12–N30   | 164.3(4) | O1–Mo1–N1   | 77.3(4)  |
| O3–Mo12–Mo11  | 100.8(2) | O13–Mo1–Mo2 | 48.0(3)  |
| O3–Mo12–O11   | 71.1(3)  | O13–Mo1–O1  | 75.6(4)  |
| O3–Mo12–N30   | 76.7(4)  | O13–Mo1–N9  | 156.6(4) |
| O8–Mo12–Mo11  | 49.1(3)  | O13–Mo1–N1  | 82.5(5)  |
| O8–Mo12–O5    | 96.7(3)  | O17–Mo1–Mo2 | 49.4(3)  |
| O8–Mo12–O3    | 93.7(3)  | O17–Mo1–O1  | 95.6(3)  |
| O8–Mo12–O11   | 160.3(4) | O17–Mo1–O13 | 93.7(4)  |
| O8–Mo12–N30   | 84.7(4)  | O17–Mo1–N9  | 84.7(5)  |
| O11–Mo12–Mo11 | 144.2(2) | O17–Mo1–N1  | 172.5(4) |
| O16–Mo12–Mo11 | 102.0(3) | N9–Mo1–Mo2  | 134.0(4) |
| O16–Mo12–O5   | 104.0(4) | N9–Mo1–N1   | 96.2(5)  |
| O16–Mo12–O3   | 156.6(4) | O27–Mo1–Mo2 | 102.3(4) |
| O16–Mo12–O8   | 104.8(4) | O27–Mo1–O1  | 158.1(5) |
| O16–Mo12–O11  | 87.4(4)  | O27–Mo1–O13 | 113.0(5) |
| O16–Mo12–N30  | 90.7(5)  | O27–Mo1–O17 | 103.6(5) |
| N30–Mo12–Mo11 | 133.8(3) | O27–Mo1–N9  | 89.9(6)  |



|              |          |              |          |
|--------------|----------|--------------|----------|
| N30–Mo12–O11 | 79.7(4)  | O27–Mo1–N1   | 83.9(5)  |
| O6–Mo5–Mo6   | 49.3(2)  | N1–Mo1–Mo2   | 128.8(4) |
| O6–Mo5–O7    | 82.4(3)  | O4–Mo2–Mo1   | 98.1(2)  |
| O6–Mo5–O1    | 90.6(4)  | O4–Mo2–N5    | 80.5(4)  |
| O6–Mo5–N10   | 162.8(4) | O4–Mo2–N13   | 77.6(4)  |
| O7–Mo5–Mo6   | 85.4(2)  | O13–Mo2–Mo1  | 49.4(3)  |
| O1–Mo5–Mo6   | 138.5(3) | O13–Mo2–O4   | 94.2(4)  |
| O1–Mo5–O7    | 78.1(3)  | O13–Mo2–O17  | 94.5(4)  |
| O1–Mo5–N10   | 81.2(4)  | O13–Mo2–N5   | 84.6(5)  |
| O21–Mo5–Mo6  | 47.7(3)  | O13–Mo2–N13  | 171.8(4) |
| O21–Mo5–O6   | 95.7(4)  | O17–Mo2–Mo1  | 48.8(3)  |
| O21–Mo5–O7   | 79.6(3)  | O17–Mo2–O4   | 76.4(4)  |
| O21–Mo5–O1   | 155.7(4) | O17–Mo2–N5   | 156.8(4) |
| O21–Mo5–N10  | 86.1(4)  | O17–Mo2–N13  | 83.4(5)  |
| O25–Mo5–Mo6  | 99.1(4)  | O28–Mo2–Mo1  | 101.7(5) |
| O25–Mo5–O6   | 103.0(4) | O28–Mo2–O4   | 159.3(5) |
| O25–Mo5–O7   | 174.5(4) | O28–Mo2–O13  | 103.3(5) |
| O25–Mo5–O1   | 100.3(4) | O28–Mo2–O17  | 112.6(5) |
| O25–Mo5–O21  | 101.0(4) | O28–Mo2–N5   | 90.1(5)  |
| O25–Mo5–N10  | 93.3(5)  | O28–Mo2–N13  | 84.8(6)  |
| N10–Mo5–Mo6  | 133.6(4) | N5–Mo2–Mo1   | 133.8(3) |
| N10–Mo5–O7   | 81.2(4)  | N13–Mo2–Mo1  | 130.9(4) |
| O6–Mo10–Mo9  | 85.6(2)  | N13–Mo2–N5   | 94.2(5)  |
| O3–Mo10–Mo9  | 138.5(2) | Mo4–O2–Mo6   | 123.9(4) |
| O3–Mo10–O6   | 78.8(3)  | Mo4–O2–Mo8   | 131.5(4) |
| O3–Mo10–N25  | 81.0(4)  | Mo8–O2–Mo6   | 104.3(4) |
| O10–Mo10–Mo9 | 49.0(2)  | Mo11–O5–Mo4  | 133.3(4) |
| O10–Mo10–O6  | 82.7(3)  | Mo12–O5–Mo11 | 82.2(3)  |
| O10–Mo10–O3  | 90.8(3)  | Mo12–O5–Mo4  | 143.9(4) |
| O10–Mo10–O14 | 94.8(4)  | Mo6–O6–Mo5   | 81.4(3)  |
| O10–Mo10–N25 | 163.1(4) | Mo6–O6–Mo10  | 144.6(4) |
| O14–Mo10–Mo9 | 47.2(3)  | Mo5–O6–Mo10  | 133.5(4) |
| O14–Mo10–O6  | 78.7(4)  | Mo4–O7–Mo5   | 132.6(4) |
| O14–Mo10–O3  | 155.9(4) | Mo3–O7–Mo4   | 82.3(3)  |
| O14–Mo10–N25 | 87.2(4)  | Mo3–O7–Mo5   | 144.4(4) |
| O18–Mo10–Mo9 | 99.1(3)  | Mo10–O3–Mo12 | 124.8(4) |
| O18–Mo10–O6  | 173.9(4) | Mo10–O3–Mo7  | 131.1(4) |
| O18–Mo10–O3  | 99.9(4)  | Mo7–O3–Mo12  | 103.9(4) |
| O18–Mo10–O10 | 103.3(4) | Mo12–O8–Mo11 | 83.4(3)  |
| O18–Mo10–O14 | 101.6(4) | Mo8–O9–Mo6   | 103.0(4) |
| O18–Mo10–N25 | 92.6(4)  | Mo7–O9–Mo6   | 133.8(4) |
| N25–Mo10–Mo9 | 134.3(3) | Mo7–O9–Mo8   | 81.8(3)  |

|             |          |               |          |
|-------------|----------|---------------|----------|
| N25–Mo10–O6 | 81.3(4)  | Mo1–O13–Mo9   | 103.1(4) |
| O7–Mo3–Mo4  | 49.2(2)  | Mo2–O13–Mo9   | 135.1(5) |
| O7–Mo3–O4   | 86.7(3)  | Mo2–O13–Mo1   | 82.7(4)  |
| O7–Mo3–O17  | 95.0(3)  | Mo11–O4–Mo3   | 123.5(5) |
| O7–Mo3–N14  | 161.0(5) | Mo11–O4–Mo2   | 132.4(5) |
| O4–Mo3–Mo4  | 100.9(2) | Mo2–O4–Mo3    | 103.6(4) |
| O4–Mo3–O17  | 70.3(4)  | Mo10–O10–Mo11 | 133.2(4) |
| O4–Mo3–N14  | 74.3(5)  | Mo10–O10–Mo9  | 82.1(3)  |
| O12–Mo3–Mo4 | 49.4(3)  | Mo9–O10–Mo11  | 144.1(4) |
| O12–Mo3–O7  | 97.1(4)  | Mo5–O1–Mo9    | 124.0(4) |
| O12–Mo3–O4  | 94.5(4)  | Mo5–O1–Mo1    | 131.2(5) |
| O12–Mo3–O17 | 160.0(4) | Mo1–O1–Mo9    | 104.6(4) |
| O12–Mo3–N14 | 84.6(5)  | Mo8–O11–Mo12  | 134.0(4) |
| O17–Mo3–Mo4 | 144.2(2) | Mo8–O11–Mo7   | 81.5(3)  |
| O22–Mo3–Mo4 | 102.8(4) | Mo7–O11–Mo12  | 102.7(4) |
| O22–Mo3–O7  | 105.1(4) | Mo3–O12–Mo4   | 82.8(3)  |
| O22–Mo3–O4  | 155.9(4) | Mo1–O17–Mo3   | 133.9(4) |
| O22–Mo3–O12 | 104.5(5) | Mo1–O17–Mo2   | 81.8(4)  |
| O22–Mo3–O17 | 87.5(4)  | Mo9–O14–Mo10  | 83.2(4)  |
| O22–Mo3–N14 | 92.6(5)  | Mo2–O17–Mo3   | 103.1(4) |
| N14–Mo3–Mo4 | 133.7(4) | Mo6–O21–Mo5   | 83.7(3)  |

---

**Table S8.** Selected hydrogen bond distances (Å) and angles (°) in Na<sub>4</sub>[Mo<sub>12</sub>O<sub>12</sub>(μ<sub>2</sub>-O)<sub>4</sub>(μ<sub>3</sub>-O)<sub>12</sub>(3-trz)<sub>8</sub>] $\cdot$ 14H<sub>2</sub>O (**3**).

|       | D-H $\cdots$ A                     | D-H(Å) | H $\cdots$ A(Å) | D $\cdots$ A(Å) | D-H $\cdots$ A(°) |
|-------|------------------------------------|--------|-----------------|-----------------|-------------------|
| Intra | N8-H8A $\cdots$ O8                 | 0.88   | 1.99            | 2.743(2)        | 143               |
| Intra | N8-H8B $\cdots$ O25 <sup>a</sup>   | 0.88   | 2.48            | 3.212(2)        | 141               |
| Intra | N12-H12A $\cdots$ O21              | 0.88   | 1.98            | 2.750(2)        | 144               |
| Intra | N16-H16A $\cdots$ O12              | 0.88   | 2.52            | 3.060(2)        | 121               |
|       | N16-H16A $\cdots$ N28 <sup>b</sup> | 0.88   | 2.59            | 3.400(3)        | 153               |
|       | N16-H16B $\cdots$ O18 <sup>b</sup> | 0.88   | 2.28            | 2.920(2)        | 129               |
|       | N16-H16A $\cdots$ O19 <sup>b</sup> | 0.88   | 2.46            | 3.180(2)        | 139               |
| Intra | N20-H20A $\cdots$ O21              | 0.88   | 2.57            | 3.139(1)        | 123               |
| Intra | N20-H20B $\cdots$ O16 <sup>c</sup> | 0.88   | 2.28            | 3.056(1)        | 148               |
| Intra | N20-H20B $\cdots$ O23 <sup>c</sup> | 0.88   | 2.49            | 3.069(2)        | 124               |
| Intra | N24-H24A $\cdots$ O12              | 0.88   | 1.99            | 2.740(2)        | 143               |
| Intra | N28-H28A $\cdots$ O14              | 0.88   | 2.01            | 2.789(2)        | 146               |
|       | N28-H28B $\cdots$ O15 <sup>d</sup> | 0.88   | 2.47            | 3.229(2)        | 145               |
| Intra | N32-H32A $\cdots$ N20 <sup>a</sup> | 0.88   | 2.19            | 3.050(2)        | 164               |
|       | C5-H5 $\cdots$ O28 <sup>e</sup>    | 0.95   | 2.48            | 3.340(3)        | 151               |
|       | C13-H13 $\cdots$ O24 <sup>f</sup>  | 0.95   | 2.33            | 3.230(2)        | 156               |

Symmetry codes: (a)  $x, -1 + y, z$ ; (b)  $1 + x, y, z$ ; (c)  $x, 1 + y, z$ ; (d)  $-1 + x, y, z$ ; (e)  $2 - x, 1 - y, 1 - z$ ; (f)  $1 - x, 1 - y, -z$ .

**Table S9.** Selected bond distances ( Å ) and angles ( ° ) in  $\text{Na}_8[\text{Mo}_{16}\text{O}_{16}(\mu_2\text{-O})_{16}(\mu_2\text{-OH})_{16}(3\text{-trz})_8]\cdot 29\text{H}_2\text{O}$  (**4**).

| <b>Atom–Atom</b> | <b>Length/Å</b> | <b>Atom–Atom</b> | <b>Length/Å</b> |
|------------------|-----------------|------------------|-----------------|
| Mo2–Mo1          | 2.5595(8)       | Mo3–N1           | 2.184(5)        |
| Mo2–O6           | 1.951(4)        | Mo1–O6           | 1.949(4)        |
| Mo2–O4           | 2.160(4)        | Mo1–O2           | 2.170(4)        |
| Mo2–O3           | 2.106(5)        | Mo1–O1           | 2.110(4)        |
| Mo2–O5           | 1.956(5)        | Mo1–O5           | 1.951(4)        |
| Mo2–N2           | 2.216(5)        | Mo1–O9           | 1.693(5)        |
| Mo2–O10          | 1.693(4)        | Mo1–N5           | 2.214(7)        |
| Mo3–Mo4          | 2.5527(7)       | Mo4–O8           | 1.950(4)        |
| Mo3–O4           | 2.162(4)        | Mo4–O2           | 2.191(4)        |
| Mo3–O8           | 1.948(4)        | Mo4–O1           | 2.112(4)        |
| Mo3–O3           | 2.106(4)        | Mo4–O7           | 1.937(4)        |
| Mo3–O7           | 1.942(4)        | Mo4–O12          | 1.696(5)        |
| Mo3–O11          | 1.693(5)        | Mo4–N6           | 2.195(6)        |

  

| <b>Atom–Atom–Atom</b> | <b>Angle/°</b> | <b>Atom–Atom–Atom</b> | <b>Angle/°</b> |
|-----------------------|----------------|-----------------------|----------------|
| O6–Mo2–Mo1            | 48.95(1)       | O6–Mo1–N5             | 162.8(2)       |
| O6–Mo2–O4             | 89.08(1)       | O2–Mo1–Mo2            | 100.90(1)      |
| O6–Mo2–O3             | 87.45(2)       | O2–Mo1–N5             | 74.6(2)        |
| O6–Mo2–O5             | 95.33(2)       | O1–Mo1–Mo2            | 137.01(1)      |
| O6–Mo2–N2             | 163.44(2)      | O1–Mo1–O2             | 70.76(1)       |
| O4–Mo2–Mo1            | 98.60(1)       | O1–Mo1–N5             | 83.8(2)        |
| O4–Mo2–N2             | 75.54(2)       | O5–Mo1–Mo2            | 49.15(1)       |
| O3–Mo2–Mo1            | 136.05(1)      | O5–Mo1–O2             | 88.91(2)       |
| O3–Mo2–O4             | 71.70(1)       | O5–Mo1–O1             | 159.27(2)      |
| O3–Mo2–N2             | 81.98(2)       | O5–Mo1–N5             | 87.0(3)        |
| O5–Mo2–Mo1            | 48.98(1)       | O9–Mo1–Mo2            | 99.52(2)       |
| O5–Mo2–O4             | 85.19(2)       | O9–Mo1–O6             | 105.2(2)       |
| O5–Mo2–O3             | 156.69(2)      | O9–Mo1–O2             | 159.6(2)       |
| O5–Mo2–N2             | 89.54(2)       | O9–Mo1–O1             | 94.1(2)        |
| N2–Mo2–Mo1            | 138.50(1)      | O9–Mo1–O5             | 104.6(2)       |
| O10–Mo2–Mo1           | 100.38(2)      | O9–Mo1–N5             | 90.6(3)        |
| O10–Mo2–O6            | 105.69(2)      | N5–Mo1–Mo2            | 136.2(2)       |
| O10–Mo2–O4            | 160.8(2)       | O8–Mo4–Mo3            | 49.07(1)       |
| O10–Mo2–O3            | 96.3(2)        | O8–Mo4–O2             | 86.82(1)       |
| O10–Mo2–O5            | 105.1(2)       | O8–Mo4–O1             | 89.03(2)       |
| O10–Mo2–N2            | 88.2(2)        | O8–Mo4–N6             | 161.5(2)       |
| O4–Mo3–Mo4            | 98.16(1)       | O2–Mo4–Mo3            | 100.20(1)      |
| O4–Mo3–N1             | 75.69(2)       | O2–Mo4–N6             | 74.8(2)        |
| O8–Mo3–Mo4            | 49.13(1)       | O1–Mo4–Mo3            | 137.99(1)      |
| O8–Mo3–O4             | 87.83(2)       | O1–Mo4–O2             | 70.32(1)       |
| O8–Mo3–O3             | 88.56(2)       | O1–Mo4–N6             | 83.7(2)        |
| O8–Mo3–N1             | 162.9(2)       | O7–Mo4–Mo3            | 48.94(1)       |
| O3–Mo3–Mo4            | 137.39(1)      | O7–Mo4–O8             | 95.32(2)       |

|             |           |             |           |
|-------------|-----------|-------------|-----------|
| O3-Mo3-O4   | 71.66(1)  | O7-Mo4-O2   | 89.27(2)  |
| O3-Mo3-N1   | 82.05(2)  | O7-Mo4-O1   | 158.90(2) |
| O7-Mo3-Mo4  | 48.75(1)  | O7-Mo4-N6   | 85.8(2)   |
| O7-Mo3-O4   | 85.56(2)  | O12-Mo4-Mo3 | 99.54(2)  |
| O7-Mo3-O8   | 95.19(2)  | O12-Mo4-O8  | 105.3(2)  |
| O7-Mo3-O3   | 156.78(1) | O12-Mo4-O2  | 160.2(2)  |
| O7-Mo3-N1   | 88.13(1)  | O12-Mo4-O1  | 93.9(2)   |
| O11-Mo3-Mo4 | 100.48(1) | O12-Mo4-O7  | 104.8(2)  |
| O11-Mo3-O4  | 161.2(2)  | O12-Mo4-N6  | 92.2(3)   |
| O11-Mo3-O8  | 106.04(2) | N6-Mo4-Mo3  | 134.78(2) |
| O11-Mo3-O3  | 95.6(2)   | Mo1-O6-Mo2  | 82.05(1)  |
| O11-Mo3-O7  | 105.2(2)  | Mo2-O4-Mo3  | 102.39(1) |
| O11-Mo3-N1  | 89.1(2)   | Mo3-O8-Mo4  | 81.81(1)  |
| N1-Mo3-Mo4  | 136.87(1) | Mo1-O2-Mo4  | 101.98(2) |
| O6-Mo1-Mo2  | 49.00(1)  | Mo2-O3-Mo3  | 106.20(2) |
| O6-Mo1-O2   | 88.38(1)  | Mo1-O1-Mo4  | 106.71(2) |
| O6-Mo1-O1   | 88.11(2)  | Mo1-O5-Mo2  | 81.88(1)  |
| O6-Mo1-O5   | 95.55(2)  | Mo4-O7-Mo3  | 82.31(2)  |

**Table S10.** Selected hydrogen bond distances (Å) and angles (°) in  $\text{Na}_8[\text{Mo}_{16}\text{O}_{16}(\mu_2\text{-O})_{16}(\mu_2\text{-OH})_{16}(\text{3-trz})_8]\cdot 29\text{H}_2\text{O}$  (**4**).

|       | D–H⋯A                   | D–H(Å) | H⋯A(Å) | D⋯A(Å)   | D–H⋯A(°) |
|-------|-------------------------|--------|--------|----------|----------|
| Intra | O1–H1⋯O8 <sup>a</sup>   | 0.76   | 1.97   | 2.692(5) | 160      |
| Intra | O1–H1⋯O8 <sup>b</sup>   | 0.76   | 2.54   | 2.851(6) | 113      |
|       | O2–H2⋯O2w               | 0.88   | 2.14   | 2.941(7) | 150      |
|       | O2w–H2w⋯N3 <sup>c</sup> | 0.87   | 1.96   | 2.827(6) | 172      |
| Intra | O3–H3⋯O6 <sup>a</sup>   | 0.84   | 1.86   | 2.691(5) | 168      |
|       | O3w–H3w⋯O5 <sup>c</sup> | 0.84   | 2.00   | 2.843(9) | 176      |
|       | O4–H4⋯O2w               | 0.85   | 2.51   | 3.048(7) | 123      |
|       | O4–H4⋯N3 <sup>c</sup>   | 0.85   | 2.27   | 3.082(6) | 161      |
|       | N4–H22⋯O7 <sup>c</sup>  | 0.88   | 2.22   | 2.800(1) | 123      |

Symmetric codes: (a)  $5/4 - x, y, 5/4 - z$ ; (b)  $5/4 - x, 5/4 - y, z$ ; (c)  $1 - x, 1 - y, 1 - z$ .

**Table S11.** Bond valence calculations for POMs **1** – **4** respectively.

| Complexes                                                                                                                                                         | Atoms | N         | $\sum S_{ij}$             | $\Delta$                  |
|-------------------------------------------------------------------------------------------------------------------------------------------------------------------|-------|-----------|---------------------------|---------------------------|
| [Mo <sub>6</sub> O <sub>6</sub> ( $\mu_2$ -O) <sub>9</sub> (Hbtz) <sub>6</sub> ]·21H <sub>2</sub> O ( <b>1</b> )                                                  | Mo1   | 5+        | 5.145                     | 0.145                     |
|                                                                                                                                                                   | Mo2   | 5+        | 5.181                     | 0.181                     |
|                                                                                                                                                                   | Mo3   | 5+        | 5.245                     | 0.245                     |
|                                                                                                                                                                   | Mo4   | 5+        | 5.208                     | 0.208                     |
|                                                                                                                                                                   | Mo5   | 5+        | 5.369                     | 0.369                     |
|                                                                                                                                                                   | Mo6   | 5+        | 5.319                     | 0.319                     |
|                                                                                                                                                                   |       | <b>5+</b> | <b>5.245<sub>av</sub></b> | <b>0.245<sub>av</sub></b> |
| [Mo <sub>8</sub> O <sub>8</sub> ( $\mu_2$ -O) <sub>12</sub> (Hdatrz) <sub>8</sub> ]·28H <sub>2</sub> O ( <b>2</b> )                                               | Mo1   | 5+        | 5.317                     | 0.317                     |
|                                                                                                                                                                   | Mo2   | 5+        | 5.309                     | 0.309                     |
|                                                                                                                                                                   |       | <b>5+</b> | <b>5.313<sub>av</sub></b> | <b>0.313<sub>av</sub></b> |
| Na <sub>4</sub> [Mo <sub>12</sub> O <sub>12</sub> ( $\mu_2$ -O) <sub>4</sub> ( $\mu_3$ -O) <sub>12</sub> (3-trz) <sub>8</sub> ]·14H <sub>2</sub> O ( <b>3</b> )   | Mo1   | 5+        | 5.581                     | 0.581                     |
|                                                                                                                                                                   | Mo2   | 5+        | 5.642                     | 0.642                     |
|                                                                                                                                                                   | Mo3   | 5+        | 5.322                     | 0.322                     |
|                                                                                                                                                                   | Mo4   | 5+        | 5.429                     | 0.429                     |
|                                                                                                                                                                   | Mo5   | 5+        | 5.420                     | 0.420                     |
|                                                                                                                                                                   | Mo6   | 5+        | 5.248                     | 0.248                     |
|                                                                                                                                                                   | Mo7   | 5+        | 5.495                     | 0.495                     |
|                                                                                                                                                                   | Mo8   | 5+        | 5.360                     | 0.360                     |
|                                                                                                                                                                   | Mo9   | 5+        | 5.307                     | 0.307                     |
|                                                                                                                                                                   | Mo10  | 5+        | 5.295                     | 0.295                     |
|                                                                                                                                                                   | Mo11  | 5+        | 5.347                     | 0.347                     |
|                                                                                                                                                                   | Mo12  | 5+        | 5.277                     | 0.277                     |
|                                                                                                                                                                   |       | <b>5+</b> | <b>5.393<sub>av</sub></b> | <b>0.393<sub>av</sub></b> |
| Na <sub>8</sub> [Mo <sub>16</sub> O <sub>16</sub> ( $\mu_2$ -O) <sub>16</sub> ( $\mu_2$ -OH) <sub>16</sub> (3-trz) <sub>8</sub> ]·29H <sub>2</sub> O ( <b>4</b> ) | Mo1   | 5+        | 5.206                     | 0.206                     |
|                                                                                                                                                                   | Mo2   | 5+        | 5.210                     | 0.210                     |
|                                                                                                                                                                   | Mo3   | 5+        | 5.302                     | 0.302                     |
|                                                                                                                                                                   | Mo4   | 5+        | 5.225                     | 0.225                     |
|                                                                                                                                                                   |       | <b>5+</b> | <b>5.236<sub>av</sub></b> | <b>0.236<sub>av</sub></b> |

**Table S12.** Detail calibrated adsorption data of O<sub>2</sub>, CH<sub>4</sub>, H<sub>2</sub>, N<sub>2</sub> and CO<sub>2</sub> for [Mo<sub>6</sub>O<sub>6</sub>(μ<sub>2</sub>-O)<sub>9</sub>(Hbtz)<sub>6</sub>]·21H<sub>2</sub>O (**1**) at 298 K.

| Gases            |                | O <sub>2</sub>    |                | CO <sub>2</sub>   |                | CH <sub>4</sub>   |                | N <sub>2</sub>    |                | H <sub>2</sub>    |  |
|------------------|----------------|-------------------|----------------|-------------------|----------------|-------------------|----------------|-------------------|----------------|-------------------|--|
| Temperature (°C) | Pressure (bar) | Adsorption (mg/g) |  |
| 25.0             | 0              | 0                 | 0              | 0                 | 0              | 0                 | 0              | 0                 | 0              | 0                 |  |
|                  | 0.9            | 3.02036           | 0.9            | 8.98546           | 0.9            | 2.35408           | 0.9            | 2.35408           | 0.9            | 1.0482            |  |
|                  | 1.9            | 4.07172           | 1.9            | 12.34362          | 1.9            | 2.87971           | 1.9            | 2.87971           | 1.9            | 1.46448           |  |
|                  | 3.9            | 6.03101           | 3.9            | 15.76731          | 3.9            | 2.95609           | 3.9            | 2.85609           | 3.9            | 1.67429           |  |
|                  | 5.899          | 7.81108           | 5.899          | 18.88886          | 5.899          | 2.96028           | 5.899          | 2.93028           | 5.899          | 1.77095           |  |
|                  | 7.899          | 9.73785           | 7.899          | 21.54057          | 7.899          | 2.98234           | 7.899          | 2.98234           | 7.899          | 1.7949            |  |
|                  | 9.892          | 11.74674          | 9.892          | 24.20783          | 9.892          | 3.05572           | 9.892          | 3.15572           | 9.892          | 2.08097           |  |
|                  | 11.896         | 13.49734          | 11.896         | 26.36884          | 11.896         | 3.06827           | 11.896         | 3.26827           | 11.896         | 2.07146           |  |
|                  | 13.898         | 15.60089          | 13.898         | 27.44793          | 13.898         | 3.09947           | 13.898         | 3.09947           | 13.898         | 1.96403           |  |
|                  | 15.894         | 17.34734          | 15.894         | 28.95             | 15.894         | 3.02285           | 15.894         | 3.02285           | 15.894         | 1.66834           |  |
|                  | 17.897         | 19.14292          | 17.897         | 31.27345          | 17.897         | 2.96875           | 17.897         | 2.96875           | 17.897         | 1.48302           |  |
|                  | 19.893         | 20.83209          | 19.893         | 31.5933           | 19.893         | 2.9558            | 19.893         | 2.8158            | 19.893         | 2.00387           |  |
|                  | 21.898         | 22.5602           | 21.898         | 33.77469          | 21.898         | 3.06817           | 21.898         | 2.96817           | 21.898         | 2.15909           |  |
|                  | 23.896         | 24.63723          | 23.896         | 33.51867          | 23.896         | 3.09245           | 23.896         | 2.99245           | 23.896         | 2.99101           |  |
|                  | 25.894         | 26.12388          | 25.894         | 35.19543          | 25.894         | 3.08822           | 25.894         | 2.98822           | 25.894         | 2.83133           |  |
|                  | 27.894         | 27.79929          | 27.894         | 35.33227          | 27.894         | 3.011             | 27.894         | 2.911             | 27.894         | 2.88893           |  |
|                  | 29.894         | 29.76862          | 29.894         | 36.86083          | 29.894         | 2.98035           | 29.894         | 2.88035           | 29.894         | 3.58588           |  |



**Table S13.** Detail calibrated adsorption data of O<sub>2</sub>, CH<sub>4</sub>, H<sub>2</sub>, N<sub>2</sub> and CO<sub>2</sub> for [Mo<sub>8</sub>O<sub>8</sub>(μ<sub>2</sub>-O)<sub>12</sub>(Hdatrz)<sub>8</sub>]·28H<sub>2</sub>O (**2**) at 298 K.

| Gases            |                | O <sub>2</sub>    |                | CO <sub>2</sub>   |                | CH <sub>4</sub>   |                | N <sub>2</sub>    |                | H <sub>2</sub>    |  |
|------------------|----------------|-------------------|----------------|-------------------|----------------|-------------------|----------------|-------------------|----------------|-------------------|--|
| Temperature (°C) | Pressure (bar) | Adsorption (mg/g) |  |
| 25.0             | 0              | 0                 | 0              | 0                 | 0              | 0                 | 0              | 0                 | 0              | 0                 |  |
|                  | 0.9            | 3.26541           | 0.9            | 2.44609           | 0.9            | 1.67802           | 0.9            | 1.74055           | 0.9            | 1.26597           |  |
|                  | 1.891          | 4.80697           | 1.891          | 3.93266           | 1.891          | 2.07676           | 1.891          | 1.81401           | 1.891          | 1.33681           |  |
|                  | 3.891          | 7.61611           | 3.891          | 4.9746            | 3.891          | 2.00507           | 3.891          | 1.96901           | 3.891          | 1.91252           |  |
|                  | 5.900          | 10.6488           | 5.900          | 5.90545           | 5.900          | 0.90745           | 5.900          | 1.89869           | 5.900          | 1.98547           |  |
|                  | 7.899          | 13.42143          | 7.899          | 6.52245           | 7.899          | 1.22231           | 7.899          | 1.98688           | 7.899          | 2.29344           |  |
|                  | 9.899          | 15.67771          | 9.899          | 6.94787           | 9.899          | 1.58798           | 9.899          | 2.19758           | 9.899          | 2.76436           |  |
|                  | 11.900         | 19.20053          | 11.900         | 7.21367           | 11.900         | 2.10685           | 11.900         | 2.05402           | 11.900         | 1.97806           |  |
|                  | 13.896         | 21.02197          | 13.896         | 7.2307            | 13.896         | 2.0055            | 13.896         | 1.95927           | 13.896         | 2.31509           |  |
|                  | 15.900         | 24.49838          | 15.900         | 7.30199           | 15.900         | 1.51232           | 15.900         | 2.01193           | 15.900         | 1.96378           |  |
|                  | 17.895         | 27.08844          | 17.895         | 7.25238           | 17.895         | 1.62389           | 17.895         | 1.96524           | 17.895         | 2.10285           |  |
|                  | 19.897         | 29.6585           | 19.897         | 7.40219           | 19.897         | 1.80925           | 19.897         | 2.03112           | 19.897         | 1.94762           |  |
|                  | 21.896         | 32.57412          | 21.896         | 7.26068           | 21.896         | 1.31063           | 21.896         | 2.05687           | 21.896         | 2.36093           |  |
|                  | 23.896         | 35.34812          | 23.896         | 7.31659           | 23.896         | 1.18058           | 23.896         | 2.07603           | 23.896         | 2.05783           |  |
|                  | 25.898         | 37.88831          | 25.898         | 7.29275           | 25.898         | 1.3402            | 25.898         | 2.12725           | 25.898         | 2.08429           |  |
|                  | 27.895         | 40.19806          | 27.895         | 7.46985           | 27.895         | 1.37488           | 27.895         | 1.92451           | 27.895         | 2.02783           |  |
|                  | 29.892         | 42.81752          | 29.892         | 8.18262           | 29.892         | 0.96674           | 29.892         | 1.73984           | 29.892         | 2.3886            |  |

**Table S14.** Detail calibrated adsorption data of O<sub>2</sub>, CH<sub>4</sub>, H<sub>2</sub>, N<sub>2</sub> and CO<sub>2</sub> for Na<sub>4</sub>[Mo<sub>12</sub>O<sub>12</sub>(μ<sub>2</sub>-O)<sub>4</sub>(μ<sub>3</sub>-O)<sub>12</sub>(3-trz)<sub>8</sub>]<sub>2</sub>·14H<sub>2</sub>O (**3**) at 298 K.

| Gases            |                | O <sub>2</sub>    |                | CO <sub>2</sub>   |                | CH <sub>4</sub>   |                | N <sub>2</sub>    |                | H <sub>2</sub>    |  |
|------------------|----------------|-------------------|----------------|-------------------|----------------|-------------------|----------------|-------------------|----------------|-------------------|--|
| Temperature (°C) | Pressure (bar) | Adsorption (mg/g) |  |
| 25.0             | 0              | 0                 | 0              | 0                 | 0              | 0                 | 0              | 0                 | 0              | 0                 |  |
|                  | 0.893          | 2.50124           | 0.893          | 3.77367           | 0.893          | 1.78037           | 0.893          | 1.66078           | 0.893          | 1.1967            |  |
|                  | 1.890          | 3.26684           | 1.890          | 3.31444           | 1.890          | 1.82716           | 1.890          | 2.17723           | 1.890          | 1.1027            |  |
|                  | 3.900          | 4.72207           | 3.900          | 4.31341           | 3.900          | 2.67594           | 3.900          | 2.27906           | 3.900          | 1.70016           |  |
|                  | 5.890          | 6.18244           | 5.890          | 5.63293           | 5.890          | 2.9985            | 5.890          | 2.45472           | 5.890          | 1.62839           |  |
|                  | 7.900          | 7.81876           | 7.900          | 6.24564           | 7.900          | 3.49606           | 7.900          | 2.46063           | 7.900          | 1.51916           |  |
|                  | 9.892          | 9.20356           | 9.892          | 6.19706           | 9.892          | 4.00321           | 9.892          | 2.76315           | 9.892          | 1.82              |  |
|                  | 11.899         | 10.95991          | 11.899         | 6.97734           | 11.899         | 4.39461           | 11.899         | 2.85427           | 11.899         | 1.4468            |  |
|                  | 13.900         | 12.29355          | 13.900         | 7.39546           | 13.900         | 4.61269           | 13.900         | 2.84211           | 13.900         | 2.2151            |  |
|                  | 15.897         | 13.90065          | 15.897         | 7.55481           | 15.897         | 4.87352           | 15.897         | 2.77733           | 15.897         | 2.11732           |  |
|                  | 17.897         | 15.40797          | 17.897         | 8.10015           | 17.897         | 4.96758           | 17.897         | 2.60398           | 17.897         | 1.53418           |  |
|                  | 19.897         | 16.73484          | 19.897         | 7.8353            | 19.897         | 4.80213           | 19.897         | 2.77791           | 19.897         | 1.79702           |  |
|                  | 21.896         | 18.49816          | 21.896         | 7.84133           | 21.896         | 4.63769           | 21.896         | 2.8935            | 21.896         | 2.09948           |  |
|                  | 23.893         | 19.90997          | 23.893         | 7.8569            | 23.893         | 4.74399           | 23.893         | 2.89466           | 23.893         | 1.76251           |  |
|                  | 25.894         | 21.46479          | 25.894         | 7.86312           | 25.894         | 4.88507           | 25.894         | 2.89389           | 25.894         | 1.74418           |  |
|                  | 27.896         | 22.96248          | 27.896         | 7.8654            | 27.896         | 4.90019           | 27.896         | 2.74383           | 27.896         | 1.80475           |  |
|                  | 29.893         | 24.2697           | 29.893         | 7.87559           | 29.893         | 4.91564           | 29.893         | 2.76731           | 29.893         | 1.8183            |  |

**Table S15.** Detail calibrated adsorption data of O<sub>2</sub>, CH<sub>4</sub>, H<sub>2</sub>, N<sub>2</sub> and CO<sub>2</sub> for Na<sub>8</sub>[Mo<sub>16</sub>O<sub>16</sub>(μ<sub>2</sub>-O)<sub>16</sub>(μ<sub>2</sub>-OH)<sub>16</sub> (3-trz)<sub>8</sub>]·29H<sub>2</sub>O (**4**) at 298 K.

| Gases            |                | O <sub>2</sub>    |                | CO <sub>2</sub>   |                | CH <sub>4</sub>   |                | N <sub>2</sub>    |                | H <sub>2</sub>    |  |
|------------------|----------------|-------------------|----------------|-------------------|----------------|-------------------|----------------|-------------------|----------------|-------------------|--|
| Temperature (°C) | Pressure (bar) | Adsorption (mg/g) |  |
| 25.0             | 0              | 0                 | 0              | 0                 | 0              | 0                 | 0              | 0                 | 0              | 0                 |  |
|                  | 0.890          | 2.52594           | 0.890          | 5.12816           | 0.890          | 5.12816           | 0.890          | 0.95956           | 0.890          | 0.95956           |  |
|                  | 1.890          | 3.24996           | 1.890          | 6.90345           | 1.890          | 6.90345           | 1.890          | 1.73884           | 1.890          | 1.73884           |  |
|                  | 3.900          | 5.27142           | 3.900          | 9.18453           | 3.900          | 9.18453           | 3.900          | 1.48188           | 3.900          | 1.48188           |  |
|                  | 5.890          | 6.8601            | 5.890          | 10.83894          | 5.890          | 10.83894          | 5.890          | 1.09128           | 5.890          | 1.09128           |  |
|                  | 7.900          | 8.78391           | 7.900          | 12.01897          | 7.900          | 12.01897          | 7.900          | 2.2308            | 7.900          | 2.2308            |  |
|                  | 9.899          | 10.56792          | 9.899          | 12.19072          | 9.899          | 12.19072          | 9.899          | 1.64253           | 9.899          | 1.64253           |  |
|                  | 11.898         | 12.35951          | 11.898         | 12.20179          | 11.898         | 12.04179          | 11.898         | 1.93485           | 11.898         | 1.93485           |  |
|                  | 13.897         | 14.05107          | 13.897         | 12.30908          | 13.897         | 12.15908          | 13.897         | 1.27842           | 13.897         | 1.27842           |  |
|                  | 15.895         | 15.54922          | 15.895         | 12.39084          | 15.895         | 14.39084          | 15.895         | 2.30201           | 15.895         | 2.30201           |  |
|                  | 17.900         | 17.26034          | 17.900         | 12.89373          | 17.900         | 14.89373          | 17.900         | 1.24712           | 17.900         | 1.24712           |  |
|                  | 19.895         | 19.09354          | 19.895         | 12.80611          | 19.895         | 14.80611          | 19.895         | 1.52512           | 19.895         | 1.52512           |  |
|                  | 21.895         | 20.76321          | 21.895         | 12.71431          | 21.895         | 14.71431          | 21.895         | 1.99431           | 21.895         | 1.99431           |  |
|                  | 23.896         | 22.59773          | 23.896         | 12.70224          | 23.896         | 15.14224          | 23.896         | 1.73929           | 23.896         | 1.73929           |  |
|                  | 25.899         | 24.27387          | 25.899         | 12.68929          | 25.899         | 15.08929          | 25.899         | 1.82826           | 25.899         | 1.82826           |  |
|                  | 27.895         | 25.84537          | 27.895         | 12.64519          | 27.895         | 14.64519          | 27.895         | 2.22378           | 27.895         | 2.22378           |  |
|                  | 29.896         | 27.51             | 29.896         | 12.46768          | 29.896         | 14.46768          | 29.896         | 1.47732           | 29.896         | 1.47732           |  |

**Table S16.** Solid  $^{13}\text{C}$  NMR spectral data (ppm) of **1** – **4** respectively.

| Compound | $\delta$ (-C1)    | $\delta$ (-C2)    | $\delta$ (-C3) |
|----------|-------------------|-------------------|----------------|
| <b>1</b> | 146.41,<br>143.01 | 125.04,<br>123.10 | 115.82         |
| <b>2</b> | 162.61            | –                 | –              |
| <b>3</b> | 163.10            | 154.85,<br>142.72 | –              |
| <b>4</b> | 162.61            | 151.94            | –              |

## References

1. J. L. C. Rowsell and O. M. Yaghi, *J. Am. Chem. Soc.*, 2006, **128**, 1304–1315.
2. D. Kim, S. V. Kagwade and C. R. Clayton, *Surf. Interface. Anal.*, 1998, **26**, 155–159.
3. J. F. Lemonnier, S. Floquet, J. Marrot, E. Terazzi, C. Pigué, P. Lesot, A. Pinto and E. Cadot, *Chem. Eur. J.*, 2007, **13**, 3548–3557.
4. E. Cadot, B. Salignac, T. Loiseau, A. Dolbecq and F. Secheresse, *Chem. – Eur. J.*, 1999, **5**, 3390–3398.
5. B. Salignac, S. Riedel, A. Dolbecq, F. Secheresse and E. Cadot, *J. Am. Chem. Soc.*, 2000, **122**, 10381–10389.
6. J. X. Meng, Y. Lu, Y. G. Li, H. Fu and E. B. Wang, *Cryst. Growth Des.*, 2009, **9**, 4116–4126.
7. W. Zhang, J. Gong, L. Zhang, Y. Yang, Y. Liu, H. Zhang, G. Zhang, H. Dong, H. Hu, F. Zhao and Z. Kang, *Dalton Trans.*, 2013, **42**, 1760–1769.
8. E. Armakola, K. D. Demadis, I. R. Salcedo, M. Bazaga Garcia, P. Olivera Pastor, A. Cabeza, G. Mezei, T. A. Fernandes, A. M. Kirillov and A. M. Kirillov, *Inorg. Chem.*, 2019, **58**, 11522–11533.
9. Q. L. Chen, H. B. Chen, Z. X. Cao and Z. H. Zhou, *Dalton Trans.*, 2013, **42**, 1627–1636.
10. M. Aayed, S. Thabet and A. Haddad, *J. Inorg. Organomet. P.*, 2014, **24**, 291–301.
11. Y. Liu, S. X. Liu, R. G. Cao, H. M. Ji, S. W. Zhang and Y. H. Ren, *J. Solid State Chem.*, 2008, **181**, 2237–2242.
12. J. S. Yan, K. N. Gong, X. L. Xue, X. L. He, C. Zhao, Z. G. Han and H. T. Yu, *Eur. J. Inorg. Chem.*, 2014, **12**, 5969–5976.
